# Supplementary material for: PM2.5 exposure aggravates kidney damage by facilitating the lipid metabolism disorder in diabetic mice
Source: PeerJ. 2023 Sep 1;11:e15856. doi: 10.7717/peerj.15856 (PMC10476618; doi:10.7717/peerj.15856)
Supplement: Supplemental Information 1 [file peerj-11-15856-s001.xlsx]

## Sheet: Sheet1
Supplementary Table S1: Information of 474 quantified metabolites in renal metabolomics.
ID	name	mz	rt	exact_mass	ppm	formula	precursor_type	class	sub_class	KEGG	KEGG_Pathway	CAS	hmdb	library	level	posneg	DKD1	DKD2	DKD3	DKD4	DKD+P1	DKD+P2	DKD+P3	DKD+P4
M110T58	Hydroxylaminobenzene	110.059	57.9	109.053	5.23351	C6H7NO	[M+H]+	1-hydroxylamino, 2-unsubstituted benzenoids	Arylhydroxamates	C02720		100-65-2		MetaDNA	2	pos	1.32658e+07	1.40449e+07	1.12019e+07	7.7691e+07	1.1714e+07	1.17985e+07	1.14253e+07	1.26885e+07
M188T451	3-Indoleacrylate	188.074	450.9	187.063	18.7376	C11H9NO2	[M+H]+			C21283				MetaDNA	2	pos	6.18003e+06	7.71971e+07	3.18023e+07	1.90495e+07	7.18453e+06	7.07504e+06	8.34422e+06	1.06306e+07
M190T442	meso-2,6-Diaminoheptanedioate	190.09	442.4	190.095	29.9849	C7H14N2O4	[M]+	Carboxylic acids and derivatives	Amines	C00680		922-54-3		MetaDNA	2	pos	7.04337e+06	6.48936e+06	7.43816e+06	7.67322e+06	6.57432e+06	5.47921e+06	8.08309e+06	6.60418e+06
M351T590	(5Z,13E)-6,9alpha-Epoxy-11alpha-hydroxy-15-oxoprosta-5,13-dienoate	351.214	589.6	350.209	5.91088	C20H30O5	[M+H]+	Carboxylic acids and derivatives	Acryloyl compounds	C04835		100311-07-7		MetaDNA	2	pos	3.15149e+06	2.43152e+06	2.20082e+06	968615	4.17662e+06	3.79788e+06	2.15633e+06	3.30653e+06
M182T315	L-Iditol	182.08	315.3	182.079	3.29527	C6H14O6	[M]+	Organooxygen compounds	Alcohols and polyols	C01507		488-45-9	HMDB0011632	MetaDNA	2	pos	2.17569e+07	4.17298e+08	5.68754e+07	1.47883e+07	3.96091e+07	2.32492e+07	1.54742e+07	1.83626e+07
M239T249	Felbamate	239.102	249.2	238.095	4.50016	C11H14N2O4	[M+H]+	Benzene and substituted derivatives	Amino acids, peptides, and analogues	C07501	Xenobiotics biodegradation and metabolism	25451-15-4	HMDB0015084	MetaDNA	2	pos	4.43665e+07	3.67324e+07	5.16052e+07	4.92855e+07	4.43996e+07	3.50455e+07	4.83002e+07	4.87981e+07
M237T331	p-Hydroxyfelbamate	237.086	330.6	254.09	12.7972	C11H14N2O5	[M+H-H2O]+	Benzene and substituted derivatives	1-hydroxy-2-unsubstituted benzenoids	C16584	Xenobiotics biodegradation and metabolism	109482-28-2	HMDB0060669	MetaDNA	2	pos	1.42927e+07	9.99819e+06	5.61904e+06	5.36124e+06	9.55028e+06	9.05425e+06	4.61026e+06	1.50969e+07
M350T459	Prostaglandin E3	350.205	458.6	350.209	11.4217	C20H30O5	[M]+	Carboxylic acids and derivatives	Alcohols and polyols	C06439		802-31-3	HMDB0002664	MetaDNA	2	pos	4.17142e+06	3.69453e+06	3.26835e+06	3.68527e+06	3.15598e+06	2.29652e+06	4.49346e+06	1.76133e+06
M478T826_2	Antibiotic JI-20B	478.288	825.6	495.29	9.47974	C20H41N5O9	[M+H-H2O]+	Organonitrogen compounds	Alcohols and polyols	C17705	Biosynthesis of other secondary metabolites	51846-98-1		MetaDNA	2	pos	1.04886e+09	1.15057e+09	3.67644e+08	1.28728e+09	1.58992e+09	9.86983e+08	9.04554e+08	1.00001e+09
M516T812_2	L-Olivosyl-oleandolide	516.302	812.2	516.293	17.2383	C26H44O10	[M]+	Carboxylic acids and derivatives	Alcohols and polyols	C11991				MetaDNA	2	pos	9.37935e+06	8.08664e+06	5.17846e+07	4.92091e+07	2.91598e+07	4.77375e+07	4.21447e+07	4.14198e+07
M102T721	Isovaleric acid	102.033	721.2	102.068	14.6597	C5H10O2	[M]+	Fatty Acyls	Fatty acids and conjugates	C08262	Digestive system	503-74-2	HMDB0000718	BioDeepDB	2	pos	5.00637e+07	5.12748e+07	4.4381e+07	4.13993e+07	6.02906e+07	4.44056e+07	5.51197e+07	9.97566e+06
M103T69	Cadaverine	103.123	68.8	102.116	4.61587	C5H14N2	[M+H]+	Organonitrogen compounds	Amines	C01672	Amino acid metabolism; Metabolism of other amino acids; Digestive system	462-94-2	HMDB0002322	BioDeepDB	2	pos	2.02054e+07	2.41414e+07	3.70013e+07	3.07277e+07	2.49573e+07	2.30333e+07	2.71358e+07	2.33938e+07
M104T102	gamma-Aminobutyric acid	104.07	102.4	103.063	1.69116	C4H9NO2	[M+H]+	Carboxylic acids and derivatives	Amino acids, peptides, and analogues	C00334	Metabolism of cofactors and vitamins; Metabolism of other amino acids; Signal transduction; Nervous system; Sensory system; Endocrine system; Carbohydrate metabolism; Signaling molecules and interaction; Amino acid metabolism; Substance dependence	56-12-2	HMDB0000112	BioDeepDB	2	pos	9.45199e+07	9.54292e+07	7.32482e+07	8.91637e+07	1.09545e+08	6.43382e+07	2.53253e+07	7.70514e+07
M106T90	L-Serine	106.049	90.1	105.043	8.26033	C3H7NO3	[M+H]+	Carboxylic acids and derivatives	Amino acids, peptides, and analogues	C00065	Cancer: overview; Membrane transport; Signal transduction; Digestive system; Lipid metabolism; Carbohydrate metabolism; Translation; Amino acid metabolism; Energy metabolism	56-45-1	HMDB0000187	BioDeepDB	2	pos	1.05726e+08	1.43629e+08	1.10878e+08	1.09022e+08	1.04206e+08	9.92772e+07	8.80039e+07	9.67763e+07
M109T546	m-Cresol	109.101	546.4	108.058	5.16327	C7H8O	[M+H]+	Phenols	Cresols	C01467		108-39-4	HMDB0002048	BioDeepDB	2	pos	2.35816e+06	2.42155e+06	2.18021e+06	2.64683e+06	2.38167e+06	2.4494e+06	2.40766e+06	2.30005e+06
M110T59	2-Aminophenol	110.019	59.3	109.053	8.26625	C6H7NO	[M+H]+			C01987	Amino acid metabolism	95-55-6		BioDeepDB	2	pos	1.77987e+07	1.60957e+07	1.60807e+07	1.51469e+07	1.68143e+07	1.66882e+07	1.378e+07	1.79225e+07
M111T837	Pyrrole-2-carboxylic acid	111.019	837.1	111.032	8.47406	C5H5NO2	[M]+	Pyrroles	Pyrrole carboxylic acids and derivatives	C05942	Amino acid metabolism	634-97-9	HMDB0004230	BioDeepDB	2	pos	4.61496e+08	2.4893e+08	4.3485e+08	4.89226e+08	3.54616e+08	4.64425e+08	5.66089e+08	2.80824e+08
M114T306	2-Heptanone	113.964	306.2	114.105	0.369218	C7H14O	[M]+	Organooxygen compounds	Carbonyl compounds	C08380		110-43-0	HMDB0003671	BioDeepDB	2	pos	1.70563e+07	2.09763e+07	1.03466e+07	1.32266e+07	4.47261e+06	263651	8.04657e+06	1.5162e+07
M116T124	L-Proline	116.069	123.7	115.063	13.5781	C5H9NO2	[M+H]+	Carboxylic acids and derivatives	Amino acids, peptides, and analogues	C00148	Cancer: overview; Membrane transport; Digestive system; Translation; Amino acid metabolism	147-85-3	HMDB0000162	BioDeepDB	2	pos	4.55082e+07	3.09897e+07	1.26135e+07	2.39064e+07	1.03573e+07	2.84459e+07	5.48551e+07	3.35422e+06
M120T212	L-Allothreonine	120.065	212.1	119.058	3.13163	C4H9NO3	[M+H]+	Carboxylic acids and derivatives	Amino acids, peptides, and analogues	C05519	Amino acid metabolism	24830-94-2/28954-12-3/144-98-9	HMDB0004041	BioDeepDB	2	pos	6.33473e+06	4.63305e+06	2.32002e+06	4.05367e+06	6.01741e+06	535292	3.63478e+06	631316
M120T107	L-Homoserine	120.065	107	119.058	3.13163	C4H9NO3	[M+H]+	Carboxylic acids and derivatives	Amino acids, peptides, and analogues	C00263	Energy metabolism; Amino acid metabolism	672-15-1/1927-25-9	HMDB0000719	BioDeepDB	2	pos	5.78114e+07	5.62242e+07	5.46857e+07	5.88847e+07	5.17227e+07	4.62807e+07	6.26868e+07	4.8828e+07
M137T172	2-Hydroxyphenethylamine	137.079	172.1	137.084	3.77026	C8H11NO	[M]+	Organonitrogen compounds	Amines	C02735		7568-93-6	HMDB0001065	BioDeepDB	2	pos	3.29598e+07	8.02996e+07	8.00334e+07	1.05685e+08	1.34643e+08	2.26227e+07	4.2657e+07	2.27928e+07
M126T49	Ciliatine	125.984	49	125.024	16.879	C2H8NO3P	[M+H]+	Organic phosphonic acids and derivatives	Organic phosphonic acids	C03557	Membrane transport; Metabolism of other amino acids	2041-14-7	HMDB0011747	BioDeepDB	2	pos	8.06238e+07	1.16834e+07	7.0753e+07	8.99927e+07	7.93853e+07	7.84615e+07	9.4931e+07	2.03025e+07
M126T87	Taurine	126.022	86.8	125.015	2.98362	C2H7NO3S	[M+H]+	Organic sulfonic acids and derivatives	Organosulfonic acids and derivatives	C00245	Membrane transport; Metabolism of other amino acids; Lipid metabolism; Signaling molecules and interaction; Energy metabolism	107-35-7	HMDB0000251	BioDeepDB	2	pos	4.1435e+08	1.29754e+08	5.50709e+07	1.35418e+08	4.04554e+08	6.03227e+08	3.634e+08	4.071e+08
M130T84	Pipecolic acid	130.049	84.2	129.079	16.43	C6H11NO2	[M+H]+	Carboxylic acids and derivatives	Amino acids, peptides, and analogues	C00408	Amino acid metabolism	535-75-1 / 3105-95-1	HMDB0000070	BioDeepDB	2	pos	1.98031e+08	8.87671e+08	8.10837e+08	7.70609e+08	7.03247e+08	1.79636e+08	7.59918e+08	2.27441e+08
M132T32_2	cis-4-Hydroxy-D-proline	131.974	31.9	131.058	2.65185	C5H9NO3	[M+H]+	Carboxylic acids and derivatives	Amino acids, peptides, and analogues	C03440	Amino acid metabolism	2584-71-6	HMDB0060460	BioDeepDB	2	pos	1.1869e+07	1.00847e+07	1.006e+07	7.90457e+06	1.4159e+07	7.43721e+06	1.10672e+07	8.01067e+06
M132T152	L-Leucine	132.102	151.9	131.095	2.0893	C6H13NO2	[M+H]+	Carboxylic acids and derivatives	Amino acids, peptides, and analogues	C00123	Cancer: overview; Membrane transport; Signal transduction; Digestive system; Translation; Amino acid metabolism	61-90-5	HMDB0000687	BioDeepDB	2	pos	4.16641e+09	3.70344e+09	3.22716e+09	4.0477e+09	3.26129e+09	2.77794e+09	4.62657e+09	3.50138e+09
M132T331	L-Isoleucine	132.1	331.4	131.095	17.2294	C6H13NO2	[M+H]+	Carboxylic acids and derivatives	Amino acids, peptides, and analogues	C00407	Cancer: overview; Membrane transport; Digestive system; Translation; Amino acid metabolism	73-32-5	HMDB0000172	mzCloud	2	pos	1.34621e+08	1.55013e+08	3.57753e+07	9.77366e+07	7.21961e+07	1.21995e+08	5.45089e+07	1.13978e+08
M132T104	cis-4-Hydroxy-L-proline	132.102	103.9	131.058	2.48832	C5H9NO3	[M+H]+			C01015		618-27-9 / 51-35-4 / 30724-02-8		BioDeepDB	2	pos	1.37209e+08	2.62226e+08	3.31151e+08	4.67319e+07	5.47268e+07	7.63988e+07	1.75598e+08	1.99866e+08
M158T755	Pelargonic acid	158.153	755.2	158.131	1.70685	C9H18O2	[M]+	Fatty Acyls	Fatty acids and conjugates	C01601		112-05-0	HMDB0000847	BioDeepDB	2	pos	2.60832e+07	2.18134e+07	2.51667e+07	1.55502e+07	2.35688e+07	2.41163e+07	2.56313e+07	1.3277e+07
M162T86	L-Carnitine	162.112	85.9	161.105	2.76953	C7H15NO3	[M+H]+	Organonitrogen compounds	Quaternary ammonium salts	C00318	Environmental adaptation; Digestive system	541-15-1	HMDB0000062	BioDeepDB	2	pos	6.18963e+07	8.25534e+09	1.41862e+09	1.62097e+08	1.13192e+09	8.01255e+08	1.01181e+08	9.61171e+08
M163T701	Anabasine	163.039	701.2	162.116	1.79723	C10H14N2	[M+H]+			C06180		13078-04-1 / 494-52-0	HMDB0004350	BioDeepDB	2	pos	2.04852e+07	1.50293e+07	5.03542e+07	2.28651e+07	3.95697e+07	3.69922e+07	4.9708e+07	4.00468e+07
M146T64	Spermidine	146.165	64.5	145.158	3.17773	C7H19N3	[M+H]+	Organonitrogen compounds	Amines	C00315	Amino acid metabolism; Membrane transport; Metabolism of other amino acids; Digestive system	124-20-9	HMDB0001257	BioDeepDB	2	pos	1.44728e+08	2.3517e+08	6.42203e+07	6.99159e+07	6.2213e+07	2.43134e+07	1.71775e+07	1.55645e+08
M146T116	4-Guanidinobutanoic acid	146.092	116.1	145.085	2.57372	C5H11N3O2	[M+H]+	Carboxylic acids and derivatives	Amino acids, peptides, and analogues	C01035	Amino acid metabolism	463-00-3	HMDB0003464	BioDeepDB	2	pos	4.54707e+07	2.00501e+08	4.98374e+07	4.47309e+07	8.29662e+07	7.73129e+07	5.22414e+07	3.96752e+07
M147T83	L-Lysine	147.076	83.3	146.106	10.8746	C6H14N2O2	[M+H]+	Carboxylic acids and derivatives	Amino acids, peptides, and analogues	C00047	Metabolism of cofactors and vitamins; Membrane transport; Digestive system; Translation; Amino acid metabolism	56-87-1	HMDB0000182	BioDeepDB	2	pos	9.59131e+08	1.08416e+09	1.08508e+09	1.16705e+09	9.19456e+08	7.24217e+08	1.11212e+09	7.72366e+08
M147T172	4-Hydroxycinnamic acid	147.044	172.4	164.047	26.7539	C9H8O3	[M+H-H2O]+	Cinnamic acids and derivatives	Hydroxycinnamic acids and derivatives	C00811	Amino acid metabolism; Metabolism of cofactors and vitamins	7400-08-0/7400-08-0 501-98-4/501-98-4	HMDB0002035	BioDeepDB	2	pos	1.57304e+08	1.56943e+08	1.61296e+08	2.11942e+08	1.43921e+08	1.469e+08	2.20154e+08	1.43889e+08
M148T137	L-2-Hydroxyglutaric acid	148.042	136.8	148.037	2.61601	C5H8O5	[M]+	Fatty Acyls	Fatty acids and conjugates	C03196	Amino acid metabolism	13095-48-2	HMDB0000694	BioDeepDB	2	pos	1.38762e+07	1.13353e+07	2.72239e+07	2.1693e+07	7.89406e+07	7.87895e+07	1.42326e+07	1.54262e+07
M155T60_2	2,3-Butanediol	154.989	60.4	154.012	6.31339	C4H10O2S2	[M+H]+	Organooxygen compounds	Alcohols and polyols	C00265		513-85-9 / 3483-12-3	HMDB0003156	BioDeepDB	2	pos	3.16209e+07	2.45701e+07	1.09288e+07	1.53835e+07	2.04046e+07	2.30153e+07	2.0098e+07	1.71875e+07
M174T496	N-Acetylleucine	174.112	495.5	173.105	1.35991	C8H15NO3	[M+H]+	Carboxylic acids and derivatives	Amino acids, peptides, and analogues	C02710		1188-21-2	HMDB0011756	BioDeepDB	2	pos	1.88313e+07	1.12782e+07	1.39693e+07	1.98018e+07	1.01192e+06	744319	1.2012e+07	1.25736e+06
M158T53	4,5-Dihydroorotic acid	158.002	53	158.033	8.36219	C5H6N2O4	[M]+	Carboxylic acids and derivatives	Amino acids, peptides, and analogues	C00337	Nucleotide metabolism	155-54-4 / 5988-19-2	HMDB0000528	BioDeepDB	2	pos	2.24468e+07	1.14083e+07	2.26921e+07	2.55201e+07	2.03418e+07	2.1464e+07	1.94115e+07	1.27544e+07
M145T348	3-Hydroxymethylglutaric acid	145.048	347.5	162.053	14.7124	C6H10O5	[M+H-H2O]+	Fatty Acyls	Fatty acids and conjugates	C03761		503-49-1	HMDB0000355	BioDeepDB	2	pos	6.48567e+07	2.82704e+08	1.7781e+08	1.06902e+08	4.60296e+08	4.31945e+08	4.73463e+08	4.85506e+08
M163T57	Acetylcysteine	162.996	56.6	163.03	10.4088	C5H9NO3S	[M]+	Carboxylic acids and derivatives	Amino acids, peptides, and analogues	C06809		616-91-1	HMDB0001890	BioDeepDB	2	pos	3.57311e+07	6.48531e+07	3.08472e+07	4.83675e+07	4.72976e+07	6.02341e+07	6.55182e+07	5.55135e+07
M166T325	L-Phenylalanine	166.086	324.7	165.079	2.53564	C9H11NO2	[M+H]+			C00079	Cancer: overview; Membrane transport; Digestive system; Translation; Amino acid metabolism	673-06-3		BioDeepDB	2	pos	2.02164e+09	4.14667e+10	2.1414e+09	1.60449e+09	2.8976e+10	3.35316e+10	1.4956e+10	3.10243e+10
M167T551	Quinolinic acid	167.011	551.4	167.022	14.4239	C7H5NO4	[M]+	Pyridines and derivatives	Pyridinecarboxylic acids and derivatives	C03722	Amino acid metabolism; Metabolism of cofactors and vitamins; Metabolism of other amino acids	89-00-9	HMDB0000232	BioDeepDB	2	pos	4.4521e+07	4.19389e+07	3.85847e+07	4.04566e+07	6.86823e+07	5.77674e+07	7.15569e+07	6.63718e+07
M189T97	N-Alpha-acetyllysine	189.123	97.4	188.116	4.10316	C8H16N2O3	[M+H]+	Carboxylic acids and derivatives	Amino acids, peptides, and analogues	C12989		1946-82-3	HMDB0000446	BioDeepDB	2	pos	5.18649e+07	3.60132e+07	7.5781e+07	5.90089e+07	8.11954e+07	5.27725e+07	6.7886e+07	6.34023e+07
M192T486	5-Hydroxyindoleacetic acid	192.065	485.8	191.058	1.06446	C10H9NO3	[M+H]+	Indoles and derivatives	Indolyl carboxylic acids and derivatives	C05635	Amino acid metabolism; Nervous system	54-16-0	HMDB0000763	BioDeepDB	2	pos	2.16015e+07	9.30065e+06	7.54728e+06	7.34827e+06	1.49168e+07	6.40256e+06	6.24158e+06	6.82474e+06
M181T32	Acetylcholine chloride	180.989	32.2	181.087	5.77084	C7H16NO2. Cl	[M]+			C08201		60-31-1		BioDeepDB	2	pos	1.368e+07	1.49437e+07	1.338e+07	3.45915e+06	1.32576e+07	8.0675e+06	1.24608e+07	1.37292e+07
M185T63	3,4-Dihydroxymandelic acid	184.984	63.4	184.037	6.29883	C8H8O5	[M+H]+			C05580	Amino acid metabolism	14883-87-5	HMDB0001866	BioDeepDB	2	pos	3.23143e+07	3.70877e+07	4.68343e+07	4.1035e+07	2.98588e+07	5.34791e+07	4.24062e+07	5.52112e+07
M187T60	Undecanoic acid	186.955	60.4	186.162	8.11572	C11H22O2	[M+H]+	Fatty Acyls	Fatty acids and conjugates	C17715		112-37-8	HMDB0000947	BioDeepDB	2	pos	2.92969e+07	7.5956e+07	5.76594e+07	6.01808e+07	2.99991e+07	4.20205e+07	2.16535e+07	5.20388e+07
M190T408	Kynurenic acid	190.049	408.4	189.043	3.03079	C10H7NO3	[M+H]+	Quinolines and derivatives	Quinoline carboxylic acids	C01717	Amino acid metabolism	492-27-3	HMDB0000715	BioDeepDB	2	pos	1.0237e+08	2.03963e+08	5.60335e+07	5.55296e+07	8.23685e+07	3.14098e+07	1.46126e+07	6.87989e+07
M198T686	Vanillylmandelic acid	198.185	685.5	198.053	1.75513	C9H10O5	[M]+	Phenols	Methoxyphenols	C05584	Amino acid metabolism	55-10-7	HMDB0000291	BioDeepDB	2	pos	1.86278e+07	6.64777e+06	1.17609e+08	9.35341e+07	1.16996e+07	9.98961e+07	6.80547e+06	1.04404e+07
M216T652	12-Hydroxydodecanoic acid	216.195	651.6	216.173	0.379335	C12H24O3	[M]+	Hydroxy acids and derivatives	Medium-chain hydroxy acids and derivatives	C08317		505-95-3	HMDB0002059	BioDeepDB	2	pos	2.85847e+07	3.07963e+07	2.82593e+07	3.01089e+07	2.90454e+07	2.42749e+07	3.19008e+07	2.89713e+07
M200T32_1	Dodecanoic acid	199.974	32.2	200.178	5.34457	C12H24O2	[M]+	Fatty Acyls	Fatty acids and conjugates	C02679	Lipid metabolism	143-07-7	HMDB0000638	BioDeepDB	2	pos	1.01399e+07	1.52241e+07	1.2703e+07	2.32519e+06	1.3787e+07	2.01818e+07	1.57565e+07	1.56751e+07
M219T462	N-Acetylserotonin	219.112	462.4	218.106	0.816432	C12H14N2O2	[M+H]+	Indoles and derivatives	Hydroxyindoles	C00978	Amino acid metabolism	1210-83-9	HMDB0001238	BioDeepDB	2	pos	1.7595e+07	1.3918e+07	1.91471e+07	1.27663e+07	9.53182e+06	2.70197e+06	1.03498e+07	8.23855e+06
M220T348	Pantothenic acid	220.118	347.5	219.111	0.826171	C9H17NO5	[M+H]+	Alcohols and polyols	Polyols	C00864	Metabolism of cofactors and vitamins; Metabolism of other amino acids; Digestive system	79-83-4 / 20938-62-9 / 137-08-6	HMDB0000210	BioDeepDB	2	pos	1.01949e+09	4.61305e+09	9.74669e+09	3.56098e+09	3.14377e+08	2.1622e+08	8.41658e+07	1.15662e+08
M204T95	N-Acetyl-D-glucosamine	204.086	94.7	221.09	15.3563	C8H15NO6	[M+H-H2O]+	Organooxygen compounds	Carbohydrates and carbohydrate conjugates	C00140	Carbohydrate metabolism; Membrane transport	7512-17-6	HMDB0000215	BioDeepDB	2	pos	4.45862e+08	5.89818e+08	4.63321e+08	2.82487e+08	2.60052e+08	1.90355e+08	3.81141e+08	3.86779e+08
M208T524	N-Acetyl-L-phenylalanine	208.097	523.5	207.089	0.845761	C11H13NO3	[M+H]+	Carboxylic acids and derivatives	Amino acids, peptides, and analogues	C03519	Amino acid metabolism	2018-61-3	HMDB0000512	BioDeepDB	2	pos	1.50354e+07	8.2927e+06	7.60886e+06	5.17328e+06	5.91497e+06	3.47363e+06	5.64935e+06	5.9209e+06
M228T741	Deoxyuridine	228.196	740.6	228.075	0.575698	C9H12N2O5	[M]+	Pyrimidine nucleosides	Pyrimidine 2'-deoxyribonucleosides	C00526	Membrane transport; Nucleotide metabolism	951-78-0	HMDB0000012	BioDeepDB	2	pos	1.3677e+09	9.17887e+08	1.6924e+09	1.49086e+09	1.10538e+09	1.1039e+09	1.09682e+09	2.53989e+09
M226T686	Porphobilinogen	226.18	685.5	226.095	3.89494	C10H14N2O4	[M]+	Organonitrogen compounds	Amines	C00931	Metabolism of cofactors and vitamins	487-90-1	HMDB0000245	BioDeepDB	2	pos	2.61494e+08	3.09948e+08	1.57259e+08	1.53625e+08	1.93482e+08	2.79857e+08	1.48754e+08	2.75961e+08
M241T82	L-Cystine	241.03	81.9	240.024	5.29395	C6H12N2O4S2	[M+H]+	Carboxylic acids and derivatives	Amino acids, peptides, and analogues	C00491	Amino acid metabolism; Membrane transport; Cell growth and death; Digestive system	56-89-3	HMDB0000192	BioDeepDB	2	pos	1.16222e+08	2.94247e+07	6.91902e+07	6.04075e+07	1.49688e+08	1.48304e+08	1.25942e+08	3.94638e+07
M243T367	1-Hexadecanol	243.182	367.2	242.261	1.88249	C16H34O	[M+H]+	Fatty Acyls	Fatty alcohols	C00823	Lipid metabolism	36653-82-4	HMDB0003424	BioDeepDB	2	pos	1.44628e+08	1.17963e+08	1.3921e+08	1.26977e+08	1.08788e+08	8.75215e+07	1.26977e+08	2.03181e+08
M278T442	Gamma-Linolenic acid	278.184	442.3	278.225	4.51149	C18H30O2	[M]+	Fatty Acyls	Lineolic acids and derivatives	C06426	Lipid metabolism	506-26-3	HMDB0003073	BioDeepDB	2	pos	8.89368e+06	1.57031e+07	5.15958e+06	7.51371e+06	6.49142e+06	3.32707e+06	6.28712e+06	8.79129e+06
M282T134	1-Methyladenosine	282.122	134.4	281.112	6.3193	C11H15N5O4	[M+H]+	Purine nucleosides		C02494		15763-06-1	HMDB0003331	BioDeepDB	2	pos	2.99757e+07	1.84139e+07	2.52268e+07	3.19884e+07	1.42682e+07	1.30431e+07	1.8096e+07	2.97442e+07
M284T258	Guanosine	284.098	257.9	283.092	4.13942	C10H13N5O5	[M+H]+	Purine nucleosides		C00387	Membrane transport; Nucleotide metabolism	118-00-3	HMDB0000133	BioDeepDB	2	pos	9.22931e+08	1.34595e+09	3.53071e+08	5.67059e+08	1.26457e+08	2.35727e+07	2.86052e+07	1.48477e+07
M285T637	Glycitein	285.075	637.1	284.068	3.42366	C16H12O5	[M+H]+	Isoflavonoids	Isoflav-2-enes	C14536		40957-83-3 / NA	HMDB0005781	BioDeepDB	2	pos	7.99352e+06	2.62392e+07	6.40654e+06	2.31459e+06	9.76177e+06	7.56207e+06	7.41702e+06	3.22593e+07
M288T737_2	Dehydroepiandrosterone	288.289	737.1	288.209	3.66284	C19H28O2	[M]+	Steroids and steroid derivatives	Androstane steroids	C01227	Lipid metabolism; Cancer: overview; Endocrine system; Cancer: specific types	53-43-0	HMDB0000077	BioDeepDB	2	pos	2.49635e+10	6.38524e+09	6.5572e+09	3.05352e+10	2.27698e+09	1.04177e+10	2.35207e+10	1.47331e+10
M295T76	Indican	294.937	76.2	295.106	7.2652	C14H17NO6	[M]+			C08481		487-60-5		BioDeepDB	2	pos	3.6451e+07	1.07552e+08	1.88085e+07	1.93531e+07	3.51758e+07	2.23603e+07	2.48699e+06	1.22885e+06
M298T375	5'-Methylthioadenosine	298.095	374.8	297.09	5.62236	C11H15N5O3S	[M+H]+	5'-deoxyribonucleosides	5'-deoxy-5'-thionucleosides	C00170	Amino acid metabolism	2457-80-9	HMDB0001173	BioDeepDB	2	pos	3.66408e+08	8.08077e+08	1.83614e+08	3.72223e+08	2.27569e+08	4.81488e+07	1.48038e+07	4.38526e+07
M282T782	Oleic acid	282.28	782.1	282.256	1.82642	C18H34O2	[M]+	Fatty Acyls	Fatty acids and conjugates	C00712	Lipid metabolism	112-80-1	HMDB0000207	BioDeepDB	2	pos	5.99676e+07	1.08621e+07	4.57591e+07	7.40437e+06	1.55571e+07	4.14841e+07	2.32404e+07	4.64363e+08
M302T755	Sphinganine	302.304	754.7	301.298	1.30027	C18H39NO2	[M+H]+	Organonitrogen compounds	Amines	C00836	Lipid metabolism; Signal transduction	764-22-7	HMDB0000269	BioDeepDB	2	pos	1.03598e+08	1.03217e+07	1.23735e+08	1.43687e+08	1.26503e+08	5.48112e+07	1.92169e+08	1.60096e+08
M286T745	Fisetin	286.273	745.5	286.048	4.28851	C15H10O6	[M]+			C10041		345909-34-4		BioDeepDB	2	pos	1.62886e+08	1.46453e+08	1.83262e+08	1.44753e+08	2.39047e+08	1.31076e+08	1.68442e+08	2.47675e+08
M324T97	CMP	324.058	97.4	323.052	1.95054	C9H14N3O8P	[M+H]+	Pyrimidine nucleotides	Pyrimidine ribonucleotides	C00055	Nucleotide metabolism	63-37-6	HMDB0000095	BioDeepDB	2	pos	4.94492e+07	4.55934e+07	4.15037e+07	1.45269e+08	6.72628e+07	3.12217e+07	2.93821e+07	4.91499e+07
M328T449_1	Docosahexaenoic acid	328.2	449.4	328.24	1.70067	C22H32O2	[M]+	Fatty Acyls	Fatty acids and conjugates	C06429	Lipid metabolism	6217-54-5	HMDB0002183	BioDeepDB	2	pos	1.98194e+06	2.00072e+06	1.11327e+06	1.41755e+06	2.49025e+06	2.31115e+06	1.56909e+06	1.10725e+06
M337T694	Prostaglandin F2a	337.236	693.9	354.241	8.10708	C20H34O5	[M+H-H2O]+	Fatty Acyls	Eicosanoids	C00639	Nervous system; Signal transduction; Digestive system; Endocrine system; Lipid metabolism; Signaling molecules and interaction	551-11-1	HMDB0001139	BioDeepDB	2	pos	1.75906e+07	1.89797e+07	1.79319e+07	2.80965e+06	1.93677e+07	7.01104e+06	3.11196e+06	2.29546e+07
M338T818	Erucic acid	338.338	818.3	338.318	2.73099	C22H42O2	[M-H2O+NH4]+	Fatty Acyls	Fatty acids and conjugates	C08316	Lipid metabolism	112-86-7	HMDB0002068	BioDeepDB	2	pos	5.0387e+08	8.94275e+07	3.782e+08	6.45651e+08	4.64624e+08	6.7549e+08	4.54359e+08	1.87768e+08
M361T665	Cortisone	361.2	664.5	360.194	0.915481	C21H28O5	[M+H]+	Steroids and steroid derivatives	Hydroxysteroids	C00762	Lipid metabolism; Cancer: overview; Excretory system; Cancer: specific types	53-06-5	HMDB0002802	BioDeepDB	2	pos	4.04411e+06	2.1601e+06	4.09101e+06	7.0583e+06	9.14089e+06	9.09912e+06	8.9669e+06	8.17288e+06
M347T708_1	Corticosterone	347.221	707.5	346.214	3.3869	C21H30O4	[M+H]+	Steroids and steroid derivatives	Hydroxysteroids	C02140	Lipid metabolism; Neurodegenerative disease; Endocrine system	50-22-6	HMDB0001547	BioDeepDB	2	pos	3.02377e+07	2.10788e+07	1.6077e+07	1.67775e+07	4.01958e+07	5.85762e+07	2.75886e+07	3.28208e+07
M346T756	Cyclic GMP	346.329	756.1	345.047	6.51369	C10H12N5O7P	[M+H]+	Purine nucleotides	Cyclic purine nucleotides	C00942	Circulatory system; Nervous system; Signal transduction; Sensory system; Endocrine system; Digestive system; Environmental adaptation; Nucleotide metabolism; Cellular community - eukaryotes; Immune system	7665-99-8	HMDB0001314	BioDeepDB	2	pos	2.94477e+07	3.08698e+07	2.26003e+07	2.06082e+07	3.68338e+07	3.69155e+07	5.59979e+07	1.92774e+07
M393T439	Ursodeoxycholic acid	393.206	438.5	392.293	7.7262	C24H40O4	[M+H]+	Steroids and steroid derivatives	Bile acids, alcohols and derivatives	C07880		128-13-2	HMDB0000946	BioDeepDB	2	pos	1.01286e+06	732940	911109	876384	6.08809e+06	5.99363e+06	4.34185e+06	943271
M376T786	Lithocholic acid	376.31	785.9	376.298	6.17755	C24H40O3	[M]+	Lipids and lipid-like molecules	Steroids and steroid derivatives	C03990	Digestive system	434-13-9	HMDB0000761	BioDeepDB	2	pos	7.17479e+06	7.87393e+06	2.12659e+07	2.99993e+07	2.11962e+07	1.96336e+07	3.00399e+07	2.34889e+06
M385T119_1	S-Adenosylhomocysteine	385.124	119	384.122	13.4398	C14H20N6O5S	[M+H]+	5'-deoxyribonucleosides	5'-deoxy-5'-thionucleosides	C00021	Amino acid metabolism	979-92-0	HMDB0000939	BioDeepDB	2	pos	1.83561e+08	2.11188e+08	8.38476e+07	1.0491e+08	1.8279e+08	1.0025e+08	1.81785e+08	1.76301e+08
M393T790_2	Deoxycholic acid	393.284	789.6	392.293	2.78845	C24H40O4	[M+H]+	Steroids and steroid derivatives	Bile acids, alcohols and derivatives	C04483	Digestive system	83-44-3	HMDB0000626	BioDeepDB	2	pos	1.56272e+09	2.13759e+09	8.05108e+08	2.09019e+08	8.15733e+08	7.77268e+08	1.29265e+09	1.35775e+09
M415T797_2	Sodium deoxycholate	415.211	796.5	414.275	0.292696	C24H39O4. Na	[M+H]+			C11171		302-95-4		BioDeepDB	2	pos	1.74214e+08	1.33684e+08	1.67944e+08	2.0007e+08	2.0553e+08	1.34661e+08	3.00812e+08	2.82061e+07
M398T790_2	S-Adenosylmethionine	398.239	789.6	398.137	3.81966	C15H22N6O5S	[M]+			C00019	Amino acid metabolism; Folding, sorting and degradation	17176-17-9		BioDeepDB	2	pos	6.18163e+08	2.87555e+07	4.4248e+08	5.65259e+08	2.53909e+07	1.15997e+08	3.41049e+08	1.35345e+08
M428T123	ADP	428.038	123.5	427.029	0.680009	C10H15N5O10P2	[M+H]+	Purine nucleotides	Purine ribonucleotides	C00008	Transport and catabolism; Signal transduction; Sensory system; Endocrine system; Environmental adaptation; Neurodegenerative disease; Signaling molecules and interaction; Nucleotide metabolism; Energy metabolism; Immune system	58-64-0 / 20398-34-9	HMDB0001341	BioDeepDB	2	pos	2.26322e+07	3.32633e+07	2.82127e+07	3.72255e+07	5.77831e+06	6.0202e+06	1.91169e+07	3.0683e+07
M107T325	Benzaldehyde	107.049	324.6	106.042	3.29172	C7H6O	[M+H]+	Benzene and substituted derivatives	Benzoyl derivatives	C00261		100-52-7	HMDB0006115	BioDeepDB	2	pos	4.25859e+07	3.44056e+07	4.75059e+07	5.06328e+07	5.8497e+07	6.32365e+07	5.76853e+07	4.15061e+07
M120T124_1	L-Threonine	120.065	123.9	119.058	0.632988	C4H9NO3	[M+H]+	Carboxylic acids and derivatives	Amino acids, peptides, and analogues	C00188	Metabolism of cofactors and vitamins; Membrane transport; Digestive system; Translation; Amino acid metabolism	72-19-5	HMDB0000167	BioDeepDB	2	pos	1.04244e+07	1.13926e+07	1.78141e+07	8.92313e+06	8.64287e+06	1.38017e+07	2.36998e+07	1.11765e+07
M130T739	Pyrrolidonecarboxylic acid	130.051	739.1	129.043	6.15145	C5H7NO3	[M+H]+	Carboxylic acids and derivatives	Amino acids, peptides, and analogues	C02237		4042-36-8	HMDB0000805	BioDeepDB	2	pos	4.45503e+06	3.93581e+06	4.11627e+06	4.70336e+06	3.99348e+06	3.66143e+06	4.95654e+06	3.88514e+06
M136T172	p-Octopamine	136.075	172.4	153.079	27.4407	C8H11NO2	[M+H-H2O]+	Phenols	1-hydroxy-2-unsubstituted benzenoids	C04227	Signaling molecules and interaction	104-14-3	HMDB0004825	BioDeepDB	2	pos	6.51355e+08	7.8963e+08	5.96478e+08	8.14496e+08	6.00633e+08	4.87443e+08	7.68289e+08	6.00819e+08
M152T258	Guanine	152.056	257.8	151.049	2.47277	C5H5N5O	[M+H]+	Imidazopyrimidines	Purines and purine derivatives	C00242	Nucleotide metabolism	73-40-5	HMDB0000132	BioDeepDB	2	pos	1.28642e+08	3.45492e+07	4.26146e+08	5.67482e+08	1.92498e+08	1.04381e+08	4.34343e+08	5.84149e+07
M176T86	Citrulline	176.102	85.6	175.096	2.70297	C6H13N3O3	[M+H]+	Carboxylic acids and derivatives	Amino acids, peptides, and analogues	C00327	Amino acid metabolism	372-75-8	HMDB0000904	BioDeepDB	2	pos	1.83374e+08	1.42565e+08	1.08302e+08	1.50197e+08	2.10392e+07	2.25628e+07	2.18932e+07	2.08328e+07
M189T116	N6-Acetyl-L-lysine	189.123	116.4	188.116	4.10316	C8H16N2O3	[M+H]+	Carboxylic acids and derivatives	Amino acids, peptides, and analogues	C02727	Amino acid metabolism	692-04-6	HMDB0000206	BioDeepDB	2	pos	1.75336e+08	4.10123e+07	9.08217e+07	1.93934e+08	5.82538e+07	1.46392e+08	5.14672e+07	1.66239e+08
M188T80	N1-Acetylspermidine	188.175	79.8	187.168	2.12568	C9H21N3O	[M+H]+	Carboximidic acids and derivatives	Carboximidic acids	C00612		14278-49-0	HMDB0001276	BioDeepDB	2	pos	8.24112e+06	7.98598e+06	1.84792e+07	1.03579e+07	1.79699e+07	9.17553e+06	1.79652e+07	3.02304e+07
M203T91	Asymmetric dimethylarginine	203.15	90.5	202.143	1.85085	C8H18N4O2	[M+H]+	Carboxylic acids and derivatives	Amino acids, peptides, and analogues	C03626		30315-93-6/220805-22-1	HMDB0001539	BioDeepDB	2	pos	2.21914e+08	2.55167e+08	3.7738e+08	3.40735e+08	3.74827e+08	2.98677e+08	3.00328e+08	3.14858e+08
M209T319	L-Kynurenine	209.091	319.2	208.085	3.23304	C10H12N2O3	[M+H]+	Organooxygen compounds	Carbonyl compounds	C00328	Amino acid metabolism; Infectious disease: parasitic	2922-83-0/343-65-7	HMDB0000684	BioDeepDB	2	pos	1.4525e+07	2.0368e+07	3.21251e+06	2.04587e+06	6.92288e+06	1.74716e+06	1.6969e+06	1.75561e+06
M211T399	3-(3,4-Dihydroxy-5-methoxy)-2-propenoic acid	211.057	399.1	210.053	13.6266	C10H10O5	[M+H]+	Cinnamic acids and derivatives	Hydroxycinnamic acids and derivatives	C05619		1782-55-4/2041-35-2	HMDB0035484	BioDeepDB	2	pos	5.01017e+06	8.10247e+06	7.94416e+06	8.79691e+06	8.27818e+06	6.11991e+06	5.47972e+06	7.3432e+06
M222T644	Isoetharine	222.146	643.5	239.152	6.90536	C13H21NO3	[M+H-H2O]+	Phenols	Benzenediols	C07053		530-08-5	HMDB0014366	BioDeepDB	2	pos	2.9532e+06	5.65643e+08	7.56408e+07	1.22674e+07	1.86123e+07	2.2055e+07	3.03381e+06	1.22484e+07
M224T696	Cerulenin	224.127	695.7	223.121	3.55378	C12H17NO3	[M+H]+	Epoxides	Oxirane carboxylic acids and derivatives	C12058		17397-89-6	HMDB0015168	BioDeepDB	2	pos	683227	7.75129e+06	7.43696e+06	8.68221e+06	9.39308e+06	756075	5.804e+06	1.49089e+07
M249T451	6-Hydroxymelatonin	249.123	450.8	248.116	3.11493	C13H16N2O3	[M+H]+	Indoles and derivatives	Hydroxyindoles	C05643	Amino acid metabolism	2208-41-5	HMDB0004081	BioDeepDB	2	pos	838263	602095	4.71861e+06	6.38944e+06	5.33052e+06	3.85425e+06	5.88036e+06	4.54556e+06
M234T88	Muramic acid	234.097	87.6	251.101	15.9507	C9H17NO7	[M+H-H2O]+	Organooxygen compounds	Carbohydrates and carbohydrate conjugates	C06470		1114-41-6/484-57-1	HMDB0003254	BioDeepDB	2	pos	1.77487e+08	2.13695e+08	1.84906e+08	1.39818e+08	2.00599e+08	2.01306e+08	2.75196e+08	7.28069e+07
M245T161	Uridine	245.076	160.6	244.07	2.35029	C9H12N2O6	[M+H]+	Pyrimidine nucleosides		C00299	Membrane transport; Nucleotide metabolism	58-96-8	HMDB0000296	BioDeepDB	2	pos	1.8972e+08	1.41441e+08	2.43001e+08	2.5526e+08	3.57089e+08	2.67838e+08	3.0781e+08	3.44359e+08
M266T89	Thiamine	266.124	88.5	265.112	15.4966	C12H17N4OS	[M+H]+	Diazines	Pyrimidines and pyrimidine derivatives	C00378	Metabolism of cofactors and vitamins; Digestive system; Membrane transport; Folding, sorting and degradation	59-43-8	HMDB0000235	BioDeepDB	2	pos	1.61349e+08	2.6994e+08	2.53207e+08	3.02626e+08	2.82253e+08	2.75368e+08	2.67665e+08	2.72013e+08
M266T686	Mirtazapine	266.172	685.5	265.158	25.2619	C17H19N3	[M+H]+	Piperazinoazepines		C07570		61337-67-5/85650-52-8	HMDB0014514	MoNA	2	pos	1.72886e+08	9.9036e+07	1.32705e+08	9.62468e+07	9.86947e+07	1.23052e+08	1.02049e+08	1.27906e+08
M269T260	Inosine	269.087	259.9	268.081	5.20279	C10H12N4O5	[M+H]+	Purine nucleosides		C00294	Membrane transport; Nucleotide metabolism	58-63-9	HMDB0000195	BioDeepDB	2	pos	8.59274e+09	7.73016e+09	5.12284e+09	8.65435e+09	4.41581e+09	4.14848e+09	7.38197e+09	3.46178e+09
M304T669	Flumazenil	304.116	668.8	303.102	24.004	C15H14FN3O3	[M+H]+	Benzodiazepines	1,4-benzodiazepines	C07825		78755-81-4	HMDB0015336	BioDeepDB	2	pos	2.40462e+06	2.42974e+06	2.82011e+06	3.38496e+06	2.16239e+06	2.08816e+06	3.02279e+06	4.39882e+06
M335T647	Delta-12-Prostaglandin J2	335.221	646.8	334.214	2.6132	C20H30O4	[M+H]+	Fatty Acyls	Eicosanoids	C05958	Lipid metabolism	87893-54-7	HMDB0004238	BioDeepDB	2	pos	4.25179e+07	1.467e+07	5.10232e+07	5.64284e+07	1.44717e+07	6.5749e+07	8.52585e+06	5.84295e+06
M335T769	13,14-Dihydro-15-keto-PGE2	335.223	769.3	352.225	15.3152	C20H32O5	[M+H-H2O]+	Fatty Acyls	Eicosanoids	C04671		363-23-5	HMDB0002776	BioDeepDB	2	pos	1.93247e+07	2.45961e+07	1.52883e+07	4.82345e+06	1.23385e+07	1.61964e+07	4.30116e+06	2.34267e+07
M335T785	(13E)-11a-Hydroxy-9,15-dioxoprost-13-enoic acid	335.223	784.6	352.225	15.0169	C20H32O5	[M+H-H2O]+	Fatty Acyls	Eicosanoids	C04654		22973-19-9	HMDB0001320	BioDeepDB	2	pos	1.88286e+07	1.46602e+07	1.0629e+07	7.44635e+06	1.17971e+07	1.5196e+07	1.45567e+07	1.27467e+07
M348T394_1	AMP	348.069	393.8	347.063	4.52784	C10H14N5O7P	[M+H]+	Purine nucleotides	Purine ribonucleotides	C00020	Endocrine and metabolic disease; Sensory system; Signal transduction; Endocrine system; Neurodegenerative disease; Nucleotide metabolism; Aging	61-19-8	HMDB0000045	BioDeepDB	2	pos	1.42387e+08	3.06531e+08	1.8272e+08	1.98493e+08	1.58677e+08	9.41508e+07	2.04825e+08	7.05752e+08
M373T791	Tangeritin	373.127	790.9	372.121	2.88374	C20H20O7	[M+H]+	Flavonoids	O-methylated flavonoids	C10190		481-53-8	HMDB0030539	BioDeepDB	2	pos	2.07734e+06	503429	1.68415e+07	1.82125e+07	2.19993e+07	1.75067e+07	1.73037e+07	1.37615e+07
M373T743	Sinensetin	373.127	742.6	372.121	2.61573	C20H20O7	[M+H]+	Flavonoids	O-methylated flavonoids	C10186		2306-27-6	HMDB0036633	BioDeepDB	2	pos	3.56494e+06	404096	9.15947e+06	6.1476e+06	1.0088e+07	8.98763e+06	6.45771e+06	4.82888e+06
M403T768	Nobiletin	403.138	767.5	402.132	1.98443	C21H22O8	[M+H]+	Flavonoids	O-methylated flavonoids	C10112		478-01-3	HMDB0029540	BioDeepDB	2	pos	2.26895e+07	2.77628e+07	2.2179e+07	3.26228e+07	1.86719e+07	2.15531e+07	2.47829e+07	1.90756e+07
M425T646_2	Benazepril	425.21	646.5	424.2	7.76086	C24H28N2O5	[M+H]+	Carboxylic acids and derivatives	Amino acids, peptides, and analogues	C06843		86541-75-5	HMDB0014682	BioDeepDB	2	pos	6.43837e+06	1.72305e+06	3.01173e+06	8.33567e+06	1.0289e+07	3.2866e+06	8.06383e+06	2.45544e+06
M496T840_2	1-palmitoylglycerophosphocholine	496.335	839.7	496.34	10.0738	C24H51NO7P	[M+H]+	Glycerophospholipids	Glycerophosphocholines	C04102		17364-16-8	HMDB0062541	BioDeepDB	2	pos	6.74628e+07	7.42601e+06	1.84239e+08	8.53607e+08	5.34911e+08	7.5069e+08	1.01576e+09	4.98719e+08
M664T119_1	NAD	664.114	118.6	664.117	3.16211	C21H28N7O14P2	[M+H]+	(5'->5')-dinucleotides		C00003	Metabolism of cofactors and vitamins; Signal transduction; Digestive system; Endocrine system; Xenobiotics biodegradation and metabolism; Aging; Energy metabolism	53-84-9	HMDB0000902	BioDeepDB	2	pos	1.06279e+08	5.3835e+07	6.962e+07	1.34011e+08	5.08497e+07	4.92418e+07	6.17411e+07	3.07151e+07
M744T111_2	NADP	744.087	111.3	744.083	4.83814	C21H29N7O17P3	[M]+	(5'->5')-dinucleotides		C00006	Metabolism of cofactors and vitamins; Metabolism of other amino acids; Xenobiotics biodegradation and metabolism; Endocrine system	53-59-8	HMDB0000217	BioDeepDB	2	pos	3.70036e+07	3.76791e+07	2.02892e+07	3.74047e+07	2.11845e+07	2.30942e+07	2.39613e+07	1.00293e+07
M138T100	Trigonelline	138.055	99.8	137.048	2.56756	C7H7NO2	[M+H]+			C01004	Metabolism of cofactors and vitamins	535-83-1	HMDB0000875	MoNA	2	pos	3.49331e+07	3.27942e+07	3.48437e+07	3.73604e+07	1.86802e+07	2.05467e+07	3.32139e+07	2.12606e+07
M136T135	Dopamine	136.076	135.3	153.079	28.9104	C8H11NO2	[M+H-H2O]+	Phenols	Benzenediols	C03758	Nervous system; Signal transduction; Digestive system; Endocrine system; Neurodegenerative disease; Signaling molecules and interaction; Amino acid metabolism; Substance dependence; Cellular community - eukaryotes	62-31-7/51-61-6	HMDB0000073	MoNA	2	pos	2.78489e+08	3.16889e+08	2.89585e+08	2.9584e+08	2.55244e+08	2.28758e+08	3.29373e+08	2.6213e+08
M139T705	Isophorone	139.111	705.4	138.105	2.70287	C9H14O	[M+H]+	Carbonyl compounds	Ketones	C14743		78-59-1	HMDB0031195	mzCloud	2	pos	5.01145e+06	4.06691e+06	4.06569e+06	5.66835e+06	4.11526e+06	3.87035e+06	4.49996e+06	4.49685e+06
M175T396	Gramine	175.126	395.7	174.116	16.1256	C11H14N2	[M+H]+	Indoles and derivatives	Indoles	C08304		87-52-5	HMDB0035762	MoNA	2	pos	1.28985e+07	7.1432e+06	2.06648e+07	1.08522e+07	1.31592e+07	2.36355e+07	1.93682e+07	1.1368e+07
M192T107	Isocitric acid	192.032	106.8	192.027	3.64374	C6H8O7	[M]+	Carboxylic acids and derivatives	Tricarboxylic acids and derivatives	C00311	Carbohydrate metabolism; Cancer: overview; Endocrine system	320-77-4	HMDB0000193	BioDeepDB	2	pos	2.95641e+07	3.96993e+07	8.08284e+07	5.37678e+07	3.65402e+07	4.03327e+07	3.08306e+07	2.12158e+07
M244T112	Cytidine	244.092	111.6	243.085	0.192588	C9H13N3O5	[M+H]+			C00475	Membrane transport; Nucleotide metabolism	65-46-3		BioDeepDB	2	pos	1.79606e+07	1.26275e+07	1.5606e+07	2.13859e+07	2.46394e+07	2.17814e+07	2.49968e+07	2.69551e+07
M190T313	Diaminopimelic acid	190.107	313.3	190.095	1.54564	C7H14N2O4	[M]+	Carboxylic acids and derivatives	Amino acids, peptides, and analogues	C00666		583-93-7 / 14289-34-0 / NA	HMDB0001370	BioDeepDB	2	pos	1.88774e+06	4.21666e+06	8.06478e+06	3.08343e+06	1.1585e+07	4.81282e+06	1.19912e+06	918585
M190T161	N-Acetylglutamic acid	190.071	161.2	189.064	1.45209	C7H11NO5	[M+H]+	Carboxylic acids and derivatives	Amino acids, peptides, and analogues	C00624	Amino acid metabolism	1188-37-0	HMDB0001138	BioDeepDB	2	pos	5.87585e+06	5.94545e+06	9.98634e+06	1.01494e+07	6.26547e+06	1.1325e+07	8.19297e+06	1.06583e+07
M222T88	N-Acetyl-D-galactosamine	222.097	88.2	221.09	2.59347	C8H15NO6	[M+H]+			C01132	Carbohydrate metabolism	14215-68-0 1811-31-0/14215-68-0/1811-31-0		BioDeepDB	2	pos	1.68095e+08	1.43087e+08	1.49503e+08	1.75022e+08	1.29161e+08	1.22111e+08	1.56552e+08	1.30549e+08
M325T110	UMP	325.04	109.5	324.036	11.0017	C9H13N2O9P	[M+H]+	Pyrimidine nucleotides	Pyrimidine ribonucleotides	C00105	Nucleotide metabolism	58-97-9	HMDB0000288	BioDeepDB	2	pos	5.77979e+06	9.82031e+06	3.94998e+06	7.88157e+06	6.6854e+06	7.69554e+06	8.06396e+06	1.51759e+07
M104T124	Choline	104.106	123.7	104.108	6.63253	C5H14NO	[M]+	Organonitrogen compounds	Quaternary ammonium salts	C00114	Cancer: overview; Membrane transport; Nervous system; Digestive system; Lipid metabolism; Amino acid metabolism	62-49-7	HMDB0000097	MoNA	2	pos	4.42632e+07	4.30458e+07	4.33805e+07	4.99137e+07	4.66696e+07	4.06594e+07	5.36375e+07	4.44882e+07
M112T111	Cytosine	112.05	111.4	111.043	3.907	C4H5N3O	[M+H]+	Diazines	Pyrimidines and pyrimidine derivatives	C00380	Nucleotide metabolism	71-30-7	HMDB0000630	MoNA	2	pos	1.58484e+07	1.62815e+07	1.3344e+07	1.28956e+07	3.60229e+06	3.30122e+06	2.72341e+06	3.46172e+06
M123T308	Niacinamide	123.057	308.1	122.048	11.4678	C6H6N2O	[M+H]+	Pyridines and derivatives	Pyridinecarboxylic acids and derivatives	C00153	Metabolism of cofactors and vitamins; Digestive system	98-92-0	HMDB0001406	MoNA	2	pos	6.47404e+07	7.66729e+07	6.47636e+07	6.66111e+07	6.73531e+07	6.88591e+07	7.05598e+07	7.24468e+07
M130T386	Isoquinoline	130.065	385.7	129.058	3.65972	C9H7N	[M+H]+	Isoquinolines and derivatives		C06323		119-65-3	HMDB0034244	mzCloud	2	pos	7.94054e+07	7.76963e+07	7.54605e+07	7.41787e+07	6.89145e+07	4.06605e+07	7.35075e+07	3.4774e+07
M131T577	(E)-3-(4-Hydroxyphenyl)-2-propenal	131.049	576.6	148.052	28.4932	C9H8O2	[M+H-H2O]+	Cinnamaldehydes		C05608		20711-53-9/2538-87-6	HMDB0040986	MoNA	2	pos	3.03152e+06	5.53889e+06	2.21555e+06	6.37911e+06	6.0179e+06	5.35623e+06	6.3118e+06	1.24979e+07
M163T71_2	5-Hydroxylysine	163.107	71.4	162.1	3.53142	C6H14N2O3	[M+H]+	Carboxylic acids and derivatives	Amino acids, peptides, and analogues	C16741	Amino acid metabolism	1190-94-9/1190-94-9 28902-93-4	HMDB0000450	MoNA	2	pos	2.2935e+07	3.82116e+07	1.24275e+07	2.06651e+07	1.93692e+07	1.1166e+07	1.3845e+07	2.3875e+07
M169T75	Pyridoxamine	169.094	74.5	168.09	16.8759	C8H12N2O2	[M+H]+	Pyridines and derivatives	Pyridoxamines	C00534	Metabolism of cofactors and vitamins; Digestive system	85-87-0	HMDB0001431	MoNA	2	pos	1.66573e+08	4.65743e+08	6.11516e+07	6.91018e+07	3.28698e+08	4.0039e+08	3.78849e+08	5.82083e+08
M189T274	Glycylleucine	189.123	274.3	188.116	1.94779	C8H16N2O3	[M+H]+	Carboxylic acids and derivatives	Amino acids, peptides, and analogues	C02155		869-19-2	HMDB0000759	MoNA	2	pos	3.45697e+07	1.31128e+08	6.09021e+07	5.33775e+07	5.35901e+06	8.85157e+06	6.48714e+06	5.99142e+06
M189T699	Ibuprofen	189.127	699	206.131	20.8008	C13H18O2	[M+H-H2O]+	Phenylpropanoic acids		C01588		15687-27-1	HMDB0001925	MoNA	2	pos	180360	1.17386e+06	389035	322135	441543	555967	37467.5	773429
M190T110	Homocitrulline	190.107	109.5	189.111	2.51445	C7H15N3O3	[M+H]+	Carboxylic acids and derivatives	Amino acids, peptides, and analogues	C02427		1190-49-4	HMDB0000679	BioDeepDB	2	pos	3.40131e+06	2.26572e+08	1.04544e+07	2.42195e+07	1.3334e+07	2.78799e+07	2.96093e+06	8.82157e+07
M218T258	Propionylcarnitine	218.139	257.9	217.131	0.348402	C10H19NO4	[M+H]+	Fatty Acyls	Fatty acid esters	C03017		17298-37-2	HMDB0000824	MoNA	2	pos	4.79795e+06	1.1801e+07	1.10181e+07	9.08408e+06	2.21361e+06	1.58921e+06	1.82189e+06	2.0108e+06
M262T80	Mannitol 1-phosphate	262.067	79.9	262.045	4.10582	C6H15O9P	[M-H2O+NH4]+	Organooxygen compounds	Carbohydrates and carbohydrate conjugates	C00644	Carbohydrate metabolism	15806-48-1	HMDB0001530	BioDeepDB	2	pos	8.89296e+06	2.48654e+07	3.85826e+07	1.88964e+07	5.22552e+07	5.51166e+07	4.29575e+07	3.54564e+07
M268T154	Adenosine	268.104	153.9	267.097	1.60347	C10H13N5O4	[M+H]+	Purine nucleosides		C00212	Circulatory system; Membrane transport; Signal transduction; Endocrine system; Neurodegenerative disease; Signaling molecules and interaction; Nucleotide metabolism; Substance dependence	58-61-7	HMDB0000050	MoNA	2	pos	1.1328e+08	8.08705e+07	7.22326e+07	1.06008e+08	2.04641e+08	1.51566e+08	1.63065e+08	1.0739e+08
M464T296	Adenylsuccinic acid	464.08	296	463.074	2.53405	C14H18N5O11P	[M+H]+	Purine nucleotides	Purine ribonucleotides	C03794	Amino acid metabolism; Nucleotide metabolism	19046-78-7	HMDB0000536	MoNA	2	pos	1.72531e+06	157088	1.03963e+06	3.45597e+06	2.24322e+06	1.72946e+06	1.73442e+06	897339
M100T341	N-Methyl-2-pyrrolidinone	100.076	341	99.0684	1.75867	C5H9NO	[M+H]+	Extractables/Leachables; Industrial Chemicals; Textile Chemicals/Auxiliary/Dyes; Excipients/Additives/Colorants; Personal Care Products/Cosmetics		C11118		872-50-4		mzCloud	2	pos	1.80504e+07	8.24927e+06	1.43001e+07	1.02197e+07	1.35366e+07	7.92614e+06	1.11164e+07	1.65488e+07
M114T411	Epsilon-caprolactam	114.091	410.9	113.084	5.47747	C6H11NO	[M+H]+	Lactams	Caprolactams	C06593		105-60-2	HMDB0062769	BioDeepDB	2	pos	1.70142e+07	5.298e+07	5.18045e+07	5.86115e+07	1.52108e+07	5.24181e+07	2.84817e+07	5.56599e+07
M115T72	L-Prolinamide	115.086	71.6	114.079	4.13603	C5H10N2O	[M+H]+			C19781		7531-52-4		mzCloud	2	pos	2.24549e+07	2.26328e+07	2.18861e+07	2.66647e+07	2.20994e+07	1.62444e+07	2.61906e+07	1.98252e+07
M123T173	4-Hydroxybenzaldehyde	123.043	172.6	122.037	7.93218	C7H6O2	[M+H]+	Organooxygen compounds	Carbonyl compounds	C00633		123-08-0	HMDB0011718	mzCloud	2	pos	7.62126e+07	7.2045e+07	2.30558e+08	2.94008e+08	2.52944e+08	3.03825e+08	5.2186e+08	5.09616e+08
M144T414	2-Naphthylamine	144.08	413.6	143.073	2.60965	C10H9N	[M+H]+	Naphthalenes		C02227		91-59-8	HMDB0041802	mzCloud	2	pos	2.84563e+06	3.11354e+06	2.71488e+06	2.81114e+06	1.71975e+07	2.87307e+06	2.90118e+06	2.80397e+06
M159T386	1,5-Naphthalenediamine	159.091	385.7	158.084	3.62057	C10H10N2	[M+H]+	Extractables/Leachables; Textile Chemicals/Auxiliary/Dyes; Industrial Chemicals		C19463		2243-62-1		mzCloud	2	pos	3.16824e+08	2.2066e+08	1.45723e+08	5.12508e+07	4.97679e+07	9.96542e+07	1.07207e+08	1.50261e+08
M165T135	3,4-Dihydroxyphenylpropanoate	165.054	135.1	182.058	22.6229	C9H10O4	[M+H-H2O]+	Phenylpropanoic acids		C10447	Amino acid metabolism	1078-61-1	HMDB0000423	mzCloud	2	pos	7.09923e+08	8.14772e+08	7.62321e+08	5.45818e+08	6.67506e+08	6.00867e+08	7.11306e+08	6.73636e+08
M196T367	Salicyluric acid	196.06	367.4	195.053	0.122411	C9H9NO4	[M+H]+	Benzene and substituted derivatives	Benzoic acids and derivatives	C07588		487-54-7	HMDB0000840	mzCloud	2	pos	1.24235e+07	1.73422e+07	1.26961e+07	1.21494e+07	8.9825e+06	1.07945e+07	1.28883e+07	1.11259e+07
M205T128	Alanyltryptophan	205.1	127.8	204.09	14.744	C11H12N2O2	[M+H]+	Carboxylic acids and derivatives	Amino acids, peptides, and analogues	C00806		54-12-6	HMDB0013209	BioDeepDB	2	pos	1.0288e+09	7.83997e+08	3.23378e+08	5.56241e+08	1.36305e+09	8.38216e+08	1.86911e+09	1.232e+09
M206T105_2	Diethylpropion	206.152	104.9	205.147	11.5255	C13H19NO	[M+H]+	Organooxygen compounds	Carbonyl compounds	C06954		c("90-84-6", "134-80-5")	HMDB0015072	mzCloud	2	pos	4.70494e+07	6.1539e+07	2.44866e+07	1.41363e+07	4.53235e+07	1.19585e+07	1.66626e+07	4.29336e+07
M250T744	Alprenolol	250.177	744	249.173	14.2099	C15H23NO2	[M+H]+	Therapeutics/Prescription Drugs		D07156				mzCloud	2	pos	1.87349e+08	1.48517e+08	2.58063e+08	3.41806e+08	3.53845e+08	2.9315e+08	2.44153e+08	2.61001e+08
M277T111	(5-L-Glutamyl)-L-glutamate	277.102	110.8	276.096	3.16129	C10H16N2O7	[M+H]+	Carboxylic acids and derivatives	Amino acids, peptides, and analogues	C05282		1116-22-9	HMDB0011737	mzCloud	2	pos	1.58084e+07	1.45703e+07	3.35679e+07	3.16787e+07	1.23854e+08	6.72428e+07	3.20729e+07	1.29655e+08
M261T96	D-Glucose 1-phosphate	261.036	96	260.03	2.58968	C6H13O9P	[M+H]+	Organooxygen compounds	Carbohydrates and carbohydrate conjugates	C00103	Carbohydrate metabolism; Lipid metabolism; Endocrine system	59-56-3	HMDB0001586	mzCloud	2	pos	5.54953e+07	3.19133e+07	8.34518e+07	8.54028e+07	1.095e+08	6.32272e+07	6.60763e+07	1.0956e+08
M265T450	Phenylacetylglutamine	265.118	450.1	264.111	1.41824	C13H16N2O4	[M+H]+	Carboxylic acids and derivatives	Amino acids, peptides, and analogues	C04148	Amino acid metabolism	28047-15-6	HMDB0006344	mzCloud	2	pos	2.81548e+06	3.50165e+06	3.11441e+06	2.18918e+06	4.62555e+06	6.48701e+06	2.198e+06	3.42378e+06
M297T312	N7-Methylguanosine	297.108	312.5	298.115	0.947636	C11H16N5O5	[M]+	Purine nucleosides		C20674		20244-86-4	HMDB0001107	mzCloud	2	pos	1.18069e+07	1.19184e+07	1.33635e+07	1.06896e+07	4.65644e+07	4.14408e+07	2.53146e+07	1.796e+07
M301T71	Temazepam	301.071	71.1	300.067	9.22041	C16H13ClN2O2	[M+H]+	Benzodiazepines	1,4-benzodiazepines	C07125		846-50-4	HMDB0014376	mzCloud	2	pos	9.78682e+06	1.02487e+07	8.98221e+06	1.10775e+07	2.43263e+06	3.90447e+06	9.87688e+06	7.61722e+06
M298T780	Tridemorph	298.308	780.4	297.303	6.62402	C19H39NO	[M+H]+	Oxazinanes	Morpholines	C11285		c("24602-86-6", "81412-43-3", "NA")	HMDB0031810	mzCloud	2	pos	1.7608e+07	2.07939e+07	1.24226e+07	1.33466e+07	2.40919e+07	3.40738e+06	2.42519e+06	1.66527e+07
M302T838	EPA (d5)	302.218	837.7	302.225	23.0966	C20H30O2	[M]+	Fatty Acyls	Fatty acids and conjugates	C06428	Lipid metabolism	10417-94-4	HMDB0001999	mzCloud	2	pos	1.23896e+07	4.93922e+06	1.80424e+07	2.87462e+06	9.40681e+06	2.36246e+06	1.10426e+07	1.12948e+07
M307T106	Bz-Arg-OEt	307.185	105.6	306.169	26.4466	C15H22N4O3	[M+H]+			C01670				mzCloud	2	pos	1.8131e+07	4.14889e+06	1.972e+07	2.6686e+07	3.663e+07	2.8534e+07	5.33655e+07	2.87966e+07
M310T631	Sinapine	310.162	631.3	310.165	11.6068	C16H24NO5	[M]+	Cinnamic acids and derivatives	Hydroxycinnamic acids and derivatives	C00933		18696-26-9	HMDB0029379	mzCloud	2	pos	135455	2.35099e+06	178775	114544	3.32861e+06	1.08542e+06	3.74684e+06	286078
M412T733	Testosterone cypionate	412.303	733.4	412.298	13.2302	C27H40O3	[M]+	Therapeutics/Prescription Drugs; Sports Doping Drugs; Drugs of Abuse/Illegal Drugs		C08156		58-20-8		mzCloud	2	pos	2.48797e+06	5.32413e+06	907591	1.62299e+06	7.36688e+06	1.44018e+06	3.42607e+06	1.14364e+06
M102T730	2-Methyl-3-oxopropanoic acid	102.033	729.9	102.032	8.82071	C4H6O3	[M]+	Organooxygen compounds	Carbonyl compounds	C00349	Amino acid metabolism	6236-08-4	HMDB0001172	BioDeepDB	2	pos	4.34656e+07	6.51761e+07	5.3647e+07	5.66754e+07	4.95566e+07	5.45782e+07	6.37504e+07	6.49953e+07
M102T119	1-Aminocyclopropanecarboxylic acid	102.054	118.8	101.048	7.6038	C4H7NO2	[M+H]+	Carboxylic acids and derivatives	Amino acids, peptides, and analogues	C01234	Amino acid metabolism	22059-21-8	HMDB0036458	BioDeepDB	2	pos	2.11391e+08	6.10181e+07	2.57721e+08	1.74901e+08	1.88316e+08	3.5723e+08	1.61186e+08	2.52854e+08
M103T107	Succinic acid semialdehyde	103.039	107.2	102.032	3.64912	C4H6O3	[M+H]+	Fatty Acyls	Fatty acids and conjugates	C00232	Carbohydrate metabolism; Amino acid metabolism; Metabolism of cofactors and vitamins	692-29-5	HMDB0001259	BioDeepDB	2	pos	2.89193e+07	2.76569e+07	3.00273e+07	3.11408e+07	3.09662e+07	2.74002e+07	3.57483e+07	2.50637e+07
M104T138	2-Hydroxybutyric acid	104.052	137.8	104.047	6.62028	C4H8O3	[M]+	Hydroxy acids and derivatives	Alpha hydroxy acids and derivatives	C05984	Carbohydrate metabolism	600-15-7 / 3347-90-8	HMDB0000008	BioDeepDB	2	pos	1.35012e+08	1.76937e+08	7.87365e+07	1.3069e+08	1.76254e+08	1.78969e+08	2.3239e+08	1.56445e+08
M114T747	epsilon-Caprolactone	114.065	747.1	114.068	24.5473	C6H10O2	[M]+	Lactones		C01880		502-44-3	HMDB0060476	BioDeepDB	2	pos	3.26114e+06	3.34986e+06	3.43777e+06	3.3463e+06	3.4141e+06	3.1166e+06	3.37723e+06	3.22687e+06
M118T325	L-2,4-diaminobutyric acid	118.065	324.9	118.074	4.46528	C4H10N2O2	[M]+	Carboxylic acids and derivatives	Amino acids, peptides, and analogues	C03283	Amino acid metabolism	1758-80-1	HMDB0006284	BioDeepDB	2	pos	1.42243e+07	1.70725e+07	1.09837e+07	1.60207e+07	1.27433e+07	1.5194e+07	1.92368e+07	1.42071e+07
M118T456	Indole	118.065	455.5	117.058	2.3377	C8H7N	[M+H]+	Indoles and derivatives	Indoles	C00463	Amino acid metabolism; Digestive system	120-72-9	HMDB0000738	BioDeepDB	2	pos	8.74182e+06	7.46127e+06	7.63219e+06	8.5116e+06	7.46215e+06	7.12266e+06	9.15646e+06	6.45325e+06
M119T101	Aminomalonic acid	119.016	100.8	119.022	5.90627	C3H5NO4	[M]+	Carboxylic acids and derivatives	Amino acids, peptides, and analogues	C00872		1068-84-4	HMDB0001147	BioDeepDB	2	pos	2.87167e+07	2.93589e+07	2.62858e+07	2.58793e+07	2.888e+07	2.33851e+07	3.54982e+07	1.80605e+07
M119T135	2-Methylserine	119.049	135.3	119.058	4.84282	C4H9NO3	[M]+			C02115		5424-29-3		BioDeepDB	2	pos	3.16231e+07	2.668e+07	2.62599e+07	2.64058e+07	2.53947e+07	2.0087e+07	3.07404e+07	1.77215e+07
M121T88	(S)-2-Phenyloxirane	121.07	88.4	120.058	6.50671	C8H8O	[M+H]+			C20782		20780-54-5		BioDeepDB	2	pos	4.26464e+07	2.64845e+07	1.7457e+07	2.49327e+07	4.8408e+07	3.74761e+07	6.58476e+07	2.55323e+07
M127T105_1	1,2,3-Trihydroxybenzene	127.038	105.1	126.032	10.8314	C6H6O3	[M+H]+	Benzene and substituted derivatives	Phenols and derivatives	C01108		87-66-1	HMDB0013674	BioDeepDB	2	pos	2.09275e+08	1.86863e+08	1.74006e+08	2.01867e+08	2.2115e+08	1.18933e+08	6.36301e+08	7.62296e+07
M128T98	(R)-5,6-Dihydrothymine	128.07	98.1	128.059	4.004	C5H8N2O2	[M]+			C21028	Nucleotide metabolism	86387-01-1		BioDeepDB	2	pos	1.30881e+08	8.14273e+07	7.97208e+07	6.72728e+07	1.45026e+08	2.2433e+08	6.85097e+07	1.01651e+08
M129T72	1,1-Dimethylbiguanide	129.102	71.7	129.101	0.918869	C4H11N5	[M]+	Organonitrogen compounds	Guanidines	C07151	Signal transduction; Aging; Digestive system	1115-70-4 / 657-24-9	HMDB0001921	BioDeepDB	2	pos	1.81387e+07	1.48479e+07	2.41935e+07	2.08866e+07	1.78261e+07	1.38224e+07	2.11805e+07	1.69464e+07
M130T782	Pyrroline hydroxycarboxylic acid	130.05	782.4	129.043	2.12227	C5H7NO3	[M+H]+	Carboxylic acids and derivatives	Amino acids, peptides, and analogues	C04281	Amino acid metabolism	22573-88-2	HMDB0001369	BioDeepDB	2	pos	9.7653e+06	1.00813e+07	1.71773e+07	6.32435e+06	6.01107e+06	1.7191e+07	8.18157e+06	1.10763e+07
M131T152	5-Amino-2-oxopentanoic acid	131.053	152.3	131.058	6.48519	C5H9NO3	[M]+	Keto acids and derivatives	Short-chain keto acids and derivatives	C01110	Amino acid metabolism		HMDB0006272	BioDeepDB	2	pos	1.81318e+07	1.59263e+07	1.71355e+07	1.93892e+07	1.53632e+07	1.3347e+07	2.00548e+07	1.56614e+07
M132T720	N-Carbamoylputrescine	132.099	720.3	131.106	19.0671	C5H13N3O	[M+H]+	Carboximidic acids and derivatives	Carboximidic acids	C00436	Amino acid metabolism	6851-51-0	HMDB0033458	BioDeepDB	2	pos	3.68482e+07	3.532e+07	2.81335e+07	1.29138e+07	2.49861e+07	2.68228e+07	4.43532e+07	3.35789e+07
M133T138	5,6-Dihydro-5-fluorouracil	133.031	137.8	132.034	4.96252	C4H5FN2O2	[M+H]+	Diazines	Pyrimidines and pyrimidine derivatives	C16630	Xenobiotics biodegradation and metabolism	696-06-0	HMDB0060402	BioDeepDB	2	pos	5.32812e+08	3.6778e+08	4.1912e+08	3.72638e+08	4.31366e+08	3.40671e+08	3.1086e+08	3.92532e+08
M134T454	1,3-Dihydro-(2H)-indol-2-one	134.06	453.8	133.053	0.0595925	C8H7NO	[M+H]+	Indoles and derivatives	Indolines	C12312		59-48-3	HMDB0061918	BioDeepDB	2	pos	5.30587e+06	2.56288e+07	1.24323e+07	8.5943e+06	3.32198e+06	337176	954077	1.04261e+07
M137T85	1-Methylnicotinamide	137.071	84.8	137.071	1.97171	C7H9N2O	[M+H]+	Pyridines and derivatives	Pyridinecarboxylic acids and derivatives	C02918	Metabolism of cofactors and vitamins; Digestive system	3106-60-3	HMDB0000699	BioDeepDB	2	pos	8.9286e+07	7.73238e+07	5.49784e+07	1.01097e+08	5.35844e+07	5.21124e+07	7.16462e+07	6.03494e+07
M138T91	p-Aminobenzoic acid	138.055	91.2	137.048	1.07592	C7H7NO2	[M+H]+	Benzene and substituted derivatives	Benzoic acids and derivatives	C00568	Metabolism of cofactors and vitamins	150-13-0 / 2906-28-7	HMDB0001392	BioDeepDB	2	pos	6.09924e+06	7.98909e+07	8.30556e+06	8.54022e+06	6.97691e+07	7.67034e+07	7.56416e+07	5.87196e+07
M140T309	Acetylphosphate	139.986	308.6	139.988	14.2872	C2H5O5P	[M]+	Organic phosphoric acids and derivatives	Phosphate esters	C00227	Carbohydrate metabolism; Metabolism of other amino acids	590-54-5	HMDB0001494	BioDeepDB	2	pos	1.47592e+07	2.2151e+07	1.55822e+07	1.78138e+07	1.5872e+06	1.53566e+06	1.41046e+06	1.48196e+06
M141T105	1-Hydroxymethylnaphthalene	141.065	104.8	158.073	2.79206	C11H10O	[M+H-H2O]+	Naphthalenes		C14089		4780-79-4	HMDB0060322	BioDeepDB	2	pos	1.93836e+07	2.00416e+08	5.8556e+07	3.63923e+07	1.59164e+07	1.85959e+07	7.47752e+06	1.20702e+07
M142T68	5-Methylbarbiturate	142.035	67.6	142.038	21.8257	C5H6N2O3	[M]+			C05281	Nucleotide metabolism	2417-22-3		BioDeepDB	2	pos	1.63374e+07	1.60377e+07	1.23629e+07	1.42303e+07	1.28136e+07	1.27836e+07	1.5688e+07	1.42526e+07
M143T58	trans-trans-Muconic acid	143.032	57.6	142.027	10.4461	C6H6O4	[M+H]+	Fatty Acyls	Fatty acids and conjugates	C02480		3588-17-8 / 505-70-4 / 1119-72-8	HMDB0002349	BioDeepDB	2	pos	1.21482e+07	9.62358e+06	9.42584e+06	9.55503e+06	9.87679e+06	4.12211e+06	1.2038e+07	1.174e+07
M146T57	4-Oxoglutaramate	146.052	57.3	145.037	4.80802	C5H7NO4	[M+H]+			C05572	Amino acid metabolism			BioDeepDB	2	pos	1.72612e+07	2.87446e+07	1.35017e+07	8.35673e+06	9.83904e+06	9.92407e+06	8.8317e+06	2.29882e+06
M146T128	Oxoglutaric acid	146.027	127.9	146.022	20.7616	C5H6O5	[M]+	Keto acids and derivatives	Gamma-keto acids and derivatives	C00026	Metabolism of other amino acids; Signal transduction; Nervous system; Endocrine system; Excretory system; Carbohydrate metabolism; Amino acid metabolism	328-50-7 / 64-15-3	HMDB0000208	BioDeepDB	2	pos	4.46433e+06	1.02846e+08	1.63819e+07	1.43417e+07	4.55693e+07	3.99713e+07	2.28307e+07	8.18946e+07
M146T98	2-Keto-6-aminocaproate	146.081	98.2	145.074	1.15642	C6H11NO3	[M+H]+	Keto acids and derivatives	Medium-chain keto acids and derivatives	C03239	Amino acid metabolism		HMDB0012151	BioDeepDB	2	pos	6.39421e+07	6.32026e+07	6.36083e+07	7.36121e+07	5.73554e+07	4.74546e+07	6.96415e+07	5.2314e+07
M147T439	Dimethylbenzimidazole	147.091	439.5	146.084	0.0070409	C9H10N2	[M+H]+	Benzimidazoles		C03114	Metabolism of cofactors and vitamins	582-60-5	HMDB0003701	BioDeepDB	2	pos	48840.9	2.127e+07	5.23722e+06	1.02418e+06	1.24928e+06	1.39538e+06	349080	1.09406e+06
M151T68	(S)-4-Hydroxymandelate	151.035	67.7	168.042	2.42329	C8H8O4	[M+H-H2O]+			C03198				BioDeepDB	2	pos	8.31154e+08	4.16649e+08	1.43675e+09	2.11266e+09	1.28305e+09	1.41162e+09	1.37972e+09	1.0294e+09
M151T320	Acetaminophen	151.061	319.9	151.063	2.10143	C8H9NO2	[M]+	Phenols	1-hydroxy-2-unsubstituted benzenoids	C06804	Digestive system	103-90-2	HMDB0001859	BioDeepDB	2	pos	6.84364e+06	5.24695e+06	6.04165e+06	7.54791e+06	5.5109e+06	5.49347e+06	6.98069e+06	5.94659e+06
M151T591	N-Methyltyramine	151.096	590.9	151.1	23.1641	C9H13NO	[M]+	Benzene and substituted derivatives	Phenethylamines	C02442	Amino acid metabolism	370-98-9	HMDB0003633	BioDeepDB	2	pos	473509	8.3149e+06	3.23704e+06	1.59258e+06	2.61355e+06	1.57287e+06	831097	1.59121e+06
M153T240	p-Hydroxyphenylacetic acid	153.065	239.7	152.047	2.69902	C8H8O3	[M+H]+	Phenols	1-hydroxy-2-unsubstituted benzenoids	C00642	Amino acid metabolism	156-38-7	HMDB0000020	BioDeepDB	2	pos	9.56278e+07	1.05789e+08	8.31851e+07	8.85931e+07	9.34646e+07	9.23745e+07	9.78352e+07	1.27137e+08
M155T81	Imidazol-5-yl-pyruvate	155.042	81.4	154.038	0.0708601	C6H6N2O3	[M+H]+			C03277	Amino acid metabolism			BioDeepDB	2	pos	5.86293e+07	5.28586e+07	4.89653e+07	5.4087e+07	5.83488e+07	4.97564e+07	5.46313e+07	5.7888e+07
M175T108	2-Isopropyl-3-oxosuccinate	175.071	108.4	174.053	3.27505	C7H10O5	[M+H]+	Keto acids and derivatives	Short-chain keto acids and derivatives	C04236	Amino acid metabolism		HMDB0012149	BioDeepDB	2	pos	1.44038e+07	1.42945e+07	2.40294e+07	4.56827e+06	4.80853e+06	5.73366e+06	2.11819e+07	2.63191e+06
M160T417	D-Alanyl-D-alanine	160.096	417.3	160.085	2.74308	C6H12N2O3	[M]+	Carboxylic acids and derivatives	Amino acids, peptides, and analogues	C00993		923-16-0	HMDB0003459	BioDeepDB	2	pos	3.55513e+07	8.06617e+07	5.00584e+07	3.91986e+07	3.3061e+07	2.59567e+07	5.72731e+07	4.38164e+07
M161T134	Anatabine	161.11	134	160.1	17.4229	C10H12N2	[M+H]+	Organonitrogen compounds	Amines	C10126		581-49-7 / 2743-90-0	HMDB0004476	BioDeepDB	2	pos	4.16033e+07	2.89095e+07	4.22334e+07	3.56311e+07	4.03807e+07	4.53519e+07	2.97553e+07	3.13431e+07
M162T114	N-methyl-L-glutamic Acid	162.076	114.4	161.069	0.0224428	C6H11NO4	[M+H]+	Carboxylic acids and derivatives	Amino acids, peptides, and analogues	C01046		35989-16-3 / NA	HMDB0062660	BioDeepDB	2	pos	2.52347e+08	6.40032e+08	4.32882e+08	3.91894e+08	1.18768e+08	1.66394e+08	1.11786e+08	1.08982e+08
M162T153	O-Acetyl-L-homoserine	162.076	153.2	161.069	0.285077	C6H11NO4	[M+H]+			C01077	Amino acid metabolism	7540-67-2		BioDeepDB	2	pos	6.74035e+07	6.81666e+07	9.44007e+07	1.10408e+08	7.01423e+07	4.63853e+07	1.15451e+08	1.16977e+08
M163T117	2-Deoxy-scyllo-inosose	163.057	117	162.053	19.4779	C6H10O5	[M+H]+			C17209	Biosynthesis of other secondary metabolites			BioDeepDB	2	pos	1.45973e+07	3.75392e+06	1.50649e+07	1.49015e+07	1.5792e+07	1.34287e+07	1.52246e+07	1.53865e+07
M163T114	2-Hydroxyadipic acid	163.079	114.4	162.053	23.185	C6H10O5	[M+H]+	Fatty Acyls	Fatty acids and conjugates	C02360		18294-85-4	HMDB0000321	BioDeepDB	2	pos	3.08616e+07	7.91353e+06	1.7856e+07	2.32334e+07	2.06954e+07	9.04805e+06	7.71197e+06	2.56375e+07
M163T737	2-Deoxystreptamine	163.111	736.6	162.1	1.7219	C6H14N2O3	[M+H]+			C02627	Biosynthesis of other secondary metabolites	2037-48-1		BioDeepDB	2	pos	1.19577e+08	7.31225e+07	9.3515e+07	1.32929e+08	6.66911e+07	7.06937e+07	6.92685e+07	1.31509e+08
M164T179	Pterin	164.056	179.3	163.049	0.206109	C6H5N5O	[M+H]+	Pteridines and derivatives	Pterins and derivatives	C00715		2236-60-4	HMDB0000802	BioDeepDB	2	pos	117584	2.43711e+06	1.02195e+06	852517	4.73273e+07	5.17384e+07	3.4896e+07	5.61792e+07
M164T313	S-Methyl-L-methionine	164.074	313.3	164.075	0.0212782	C6H14NO2S	[M]+			C03172		4727-40-6		BioDeepDB	2	pos	1.0557e+06	3.10562e+07	1.52294e+06	912891	1.65931e+07	2.6526e+07	1.33877e+06	2.65756e+07
M169T139	(R)-4-Hydroxymandelate	169.06	138.5	168.042	9.73586	C8H8O4	[M+H]+			C05343				BioDeepDB	2	pos	9.98707e+07	1.08156e+08	1.13372e+08	1.0717e+08	8.69595e+07	8.92065e+07	1.09974e+08	1.04086e+08
M170T481	8-Amino-7-oxononanoate	170.117	481.3	187.121	21.9496	C9H17NO3	[M+H-H2O]+			C01092	Metabolism of cofactors and vitamins	4707-58-8		BioDeepDB	2	pos	1.95959e+06	8.98789e+07	1.4765e+07	6.45647e+06	2.899e+07	1.65344e+07	7.42324e+06	1.20555e+07
M172T430	N-Butyryl-L-homoserine lactone	172.096	429.9	171.089	2.18482	C8H13NO3	[M+H]+			C11837		67605-85-0		BioDeepDB	2	pos	5.1964e+06	6.08931e+07	3.01358e+07	5.92787e+06	2.54588e+06	1.41571e+07	1.72685e+06	1.02117e+07
M172T512	Gabapentin	172.132	512.4	171.126	1.50995	C9H17NO2	[M+H]+			C07018		60142-96-3		BioDeepDB	2	pos	3.10995e+07	3.2852e+07	3.26223e+07	2.95394e+07	3.04333e+07	3.29273e+07	3.52147e+07	8.50401e+06
M174T110	(2S,5S)-trans-Carboxymethylproline	174.087	109.5	173.069	2.32056	C7H11NO4	[M+H]+			C17366				BioDeepDB	2	pos	1.32274e+07	5.35832e+07	1.36558e+07	1.33405e+07	3.50355e+07	2.74108e+07	2.70914e+07	4.65362e+07
M176T112	Ascorbate	176.037	112.4	176.032	28.9711	C6H8O6	[M]+			C00072	Carbohydrate metabolism; Metabolism of other amino acids; Signal transduction; Digestive system	50-81-7		BioDeepDB	2	pos	1.48943e+07	1.91932e+07	1.517e+07	1.60698e+07	1.74265e+07	9.88e+06	1.49284e+07	1.12894e+07
M176T357	D-Alanyl-D-serine	176.074	356.9	176.08	0.423739	C6H12N2O4	[M]+			C19719				BioDeepDB	2	pos	4.22085e+06	4.7639e+06	3.033e+06	3.51574e+06	4.80878e+06	3.80792e+06	5.75295e+06	6.15759e+06
M180T414	L-Homophenylalanine	180.102	413.9	179.095	0.0793098	C10H13NO2	[M+H]+			C17235	Amino acid metabolism	943-73-7		BioDeepDB	2	pos	6.10791e+07	2.45294e+07	4.14578e+07	4.7157e+07	1.25878e+08	1.64722e+08	4.76701e+07	4.97822e+07
M181T412	Nicotinuric acid	181.06	411.8	180.054	1.66298	C8H8N2O3	[M+H]+	Carboxylic acids and derivatives	Amino acids, peptides, and analogues	C05380	Metabolism of cofactors and vitamins	583-08-4	HMDB0003269	BioDeepDB	2	pos	1.51697e+07	1.72471e+07	1.54137e+07	1.94638e+07	2.83334e+07	1.78029e+07	2.00024e+07	9.61816e+06
M181T539	1D-chiro-Inositol	181.086	539.5	180.063	0.216117	C6H12O6	[M+H]+			C19891	Carbohydrate metabolism	643-12-9		BioDeepDB	2	pos	3.58149e+06	2.55247e+06	2.20069e+06	3.42157e+06	2.59879e+06	2.74056e+06	3.32674e+06	3.76186e+06
M181T455	Pyridostigmine	181.097	454.7	181.098	1.79141	C9H13N2O2	[M+H]+	Pyridines and derivatives	Methylpyridines	C07410		155-97-5	HMDB0014685	BioDeepDB	2	pos	4.14677e+06	3.72418e+06	9.27904e+06	6.72479e+06	4.62964e+06	5.8911e+06	8.46126e+06	9.01219e+06
M183T147	Hydroxyphenyllactic acid	183.052	147.4	182.058	26.1962	C9H10O4	[M+H]+	Phenylpropanoic acids		C03672		306-23-0	HMDB0000755	BioDeepDB	2	pos	8.5619e+06	1.64544e+07	9.4484e+06	3.37781e+07	1.09137e+07	4.44086e+07	6.78882e+06	4.84844e+07
M183T163	2,4-Dinitrotoluene	183.041	163.2	182.033	6.68702	C7H6N2O4	[M+H]+			C11006		121-14-2		BioDeepDB	2	pos	2.72253e+07	2.55852e+07	2.02631e+07	2.59064e+07	2.172e+07	1.74653e+07	2.63625e+07	2.27921e+07
M184T92	Phosphorylcholine	184.073	92.4	184.074	0.283966	C5H15NO4P	[M+H]+	Organonitrogen compounds	Quaternary ammonium salts	C00588	Lipid metabolism; Cancer: overview	3616-04-4 / 107-73-3	HMDB0001565	BioDeepDB	2	pos	5.99663e+07	2.35944e+07	4.99186e+07	5.25254e+07	2.09342e+08	2.00486e+08	5.85458e+07	2.07902e+08
M188T345	2-Keto-6-acetamidocaproate	188.092	344.9	187.084	0.935714	C8H13NO4	[M+H]+	Keto acids and derivatives	Medium-chain keto acids and derivatives	C05548	Amino acid metabolism	59403-50-8	HMDB0012150	BioDeepDB	2	pos	2.94326e+07	2.91079e+07	3.49847e+07	2.95608e+07	9.18528e+07	4.97513e+07	7.53811e+07	8.59759e+07
M189T83	L-Targinine	189.134	83.1	188.127	0.0641451	C7H16N4O2	[M+H]+	Carboxylic acids and derivatives	Amino acids, peptides, and analogues	C03884		17035-90-4 / NA	HMDB0029416	BioDeepDB	2	pos	2.38638e+07	2.86577e+08	1.04322e+08	7.7116e+07	4.59058e+07	4.87141e+07	3.22584e+07	3.32229e+07
M204T507	N5-(L-1-Carboxyethyl)-L-ornithine	204.122	507	204.111	2.84183	C8H16N2O4	[M]+			C04210				BioDeepDB	2	pos	9.07256e+07	7.9228e+07	7.63498e+07	1.82046e+07	8.95998e+07	8.24251e+07	7.15464e+07	8.25145e+07
M212T420	Methyldopa	212.091	420	211.084	4.1303	C10H13NO4	[M+H]+	Phenylpropanoic acids		C07194		555-30-6	HMDB0011754	BioDeepDB	2	pos	1.71391e+07	1.99248e+07	2.10959e+07	1.7062e+07	1.72255e+07	1.58034e+07	1.84387e+07	1.51913e+07
M215T226	Dethiobiotin	215.138	225.9	214.132	2.99138	C10H18N2O3	[M+H]+	Fatty Acyls	Fatty acids and conjugates	C01909	Metabolism of cofactors and vitamins	533-48-2	HMDB0003581	BioDeepDB	2	pos	1.43783e+07	2.81149e+08	8.80253e+07	3.28223e+07	1.41859e+07	1.95332e+07	2.22684e+06	1.25739e+07
M219T118	D-Lysopine	219.133	117.5	218.127	3.21413	C9H18N2O4	[M+H]+			C04020	Amino acid metabolism	34522-31-1		BioDeepDB	2	pos	1.93755e+07	5.10826e+07	1.48299e+07	4.45142e+07	3.36163e+07	2.72104e+07	3.8619e+07	2.00539e+07
M221T249	Pyrimidodiazepine	221.091	248.5	221.091	0.904603	C9H11N5O2	[M]+			C02587	Metabolism of cofactors and vitamins			BioDeepDB	2	pos	1.95432e+07	2.16165e+07	1.88839e+07	1.88637e+07	2.26428e+07	3.43816e+07	1.69199e+07	2.22279e+07
M226T312	4-Amino-4-deoxychorismate	226.07	312.2	225.064	2.54788	C10H11NO5	[M+H]+			C11355	Metabolism of cofactors and vitamins	133442-18-9		BioDeepDB	2	pos	8.2307e+06	7.90084e+06	884036	517077	3.91062e+07	1.67867e+07	1.70975e+06	2.30822e+07
M245T312	beta-Alanyl-L-arginine	245.149	312.1	245.149	0.815832	C9H19N5O3	[M]+	Peptidomimetics	Hybrid peptides	C05340	Metabolism of other amino acids		HMDB0060441	BioDeepDB	2	pos	1.58212e+06	2.21458e+08	3.54952e+07	1.54558e+07	7.15617e+07	3.99458e+07	1.84819e+07	2.78222e+07
M247T92	D-Octopine	247.139	92.1	246.133	3.07996	C9H18N4O4	[M+H]+			C04137	Amino acid metabolism; Membrane transport	34522-32-2		BioDeepDB	2	pos	1.82284e+07	1.61779e+07	1.18818e+07	1.82057e+07	1.10839e+07	8.63265e+06	1.5826e+07	1.16928e+07
M230T99	Ergothioneine	230.095	99	230.096	2.8849	C9H16N3O2S	[M+H]+	Carboxylic acids and derivatives	Amino acids, peptides, and analogues	C05570	Amino acid metabolism	497-30-3 / 58511-63-0	HMDB0003045	BioDeepDB	2	pos	2.55913e+09	8.88525e+08	7.97955e+08	2.28721e+09	2.23152e+09	5.23912e+08	1.26239e+09	3.54165e+08
M232T438	N2-Succinyl-L-ornithine	232.117	437.8	232.106	1.81458	C9H16N2O5	[M]+	Carboxylic acids and derivatives	Amino acids, peptides, and analogues	C03415	Amino acid metabolism	899816-95-6	HMDB0001199	BioDeepDB	2	pos	1.24478e+07	2.03866e+06	1.64983e+07	1.44781e+07	1.56252e+07	1.26866e+07	1.00538e+07	2.20357e+07
M232T355	Butyryl-L-carnitine	232.153	354.9	231.147	2.1509	C11H21NO4	[M+H]+			C02862		25576-40-3	HMDB02013	BioDeepDB	2	pos	6.01341e+06	1.20197e+07	1.0977e+07	1.74163e+07	1.3951e+07	3.1708e+07	3.29256e+07	2.36507e+07
M233T512	N6-Acetyl-LL-2,6-diaminoheptanedioate	233.092	511.9	232.106	0.582121	C9H16N2O5	[M+H]+			C04390				BioDeepDB	2	pos	5.6123e+07	9.99252e+06	7.85298e+07	1.00006e+08	7.60121e+07	9.57735e+07	1.40474e+08	1.33533e+08
M233T112	N(omega)-Nitro-L-arginine methyl ester	233.113	112.4	233.112	0.0382009	C7H15N5O4	[M]+			C04337		50903-99-6 / 51298-62-5		BioDeepDB	2	pos	9.62114e+07	2.36111e+07	1.15944e+08	2.51043e+07	1.13527e+08	2.07221e+07	9.10242e+07	3.66544e+07
M251T323	Deoxyadenosine	251.097	323.4	251.102	17.9213	C10H13N5O3	[M]+	Purine nucleosides	Purine 2'-deoxyribonucleosides	C00559	Membrane transport; Nucleotide metabolism	958-09-8	HMDB0000101	BioDeepDB	2	pos	2.55413e+07	2.55424e+06	3.43308e+07	4.71049e+07	2.68149e+07	2.68992e+07	2.81715e+07	3.97978e+07
M255T103	Nicotinamide riboside	255.096	102.7	255.098	0.0845503	C11H15N2O5	[M]+	Organooxygen compounds	Carbohydrates and carbohydrate conjugates	C03150	Metabolism of cofactors and vitamins	1341-23-7	HMDB0000855	BioDeepDB	2	pos	3.10827e+06	4.56647e+07	4.08045e+06	5.60884e+06	1.40967e+07	2.07369e+07	9.01908e+06	1.71441e+07
M256T113	Nicotinate D-ribonucleoside	256.08	112.7	256.082	4.37906	C11H14NO6	[M]+	Organooxygen compounds	Carbohydrates and carbohydrate conjugates	C05841	Metabolism of cofactors and vitamins		HMDB0006809	BioDeepDB	2	pos	2.21016e+07	1.97538e+07	3.39612e+07	4.32528e+07	2.38011e+07	2.14912e+07	4.81319e+07	3.0445e+07
M258T84	Glycerophosphocholine	258.109	83.9	258.111	2.52442	C8H21NO6P	[M]+	Glycerophospholipids	Glycerophosphocholines	C00670	Lipid metabolism; Cancer: overview	28319-77-9	HMDB0000086	BioDeepDB	2	pos	1.34844e+09	2.80151e+08	9.48849e+08	1.38492e+09	3.09896e+08	8.73919e+08	1.48545e+09	1.07418e+09
M276T332	epsilon-(gamma-L-Glutamyl)-L-lysine	276.18	331.7	275.148	9.40516	C11H21N3O5	[M+H]+			C21730		17105-15-6		BioDeepDB	2	pos	9.98458e+06	2.18142e+06	7.09997e+06	2.46857e+07	4.3336e+06	2.17068e+07	3.76764e+07	2.00456e+07
M276T219	4-Hydroxycinnamoylagmatine	276.144	219.2	276.159	0.707231	C14H20N4O2	[M]+	Cinnamic acids and derivatives	Hydroxycinnamic acids and derivatives	C04498	Amino acid metabolism	7295-86-5	HMDB0033460	BioDeepDB	2	pos	2.25301e+07	2.81619e+08	1.43686e+08	1.09899e+08	6.54289e+07	9.96091e+07	5.99143e+07	1.19774e+08
M259T700	3-Androstanol	259.238	700.1	276.245	0.254593	C19H32O	[M+H-H2O]+			C15638		7657-50-3 / NA		BioDeepDB	2	pos	9.09006e+06	5.89829e+06	1.03141e+07	6.75765e+06	1.16787e+07	7.73304e+06	7.38723e+06	5.16618e+06
M261T87	Glucose 6-phosphate	261.036	87	260.03	1.05515	C6H13O9P	[M+H]+	Organooxygen compounds	Carbohydrates and carbohydrate conjugates	C00092	Endocrine and metabolic disease; Cancer: overview; Digestive system; Endocrine system; Carbohydrate metabolism; Biosynthesis of other secondary metabolites	56-73-5 / 299-31-0	HMDB0001401	BioDeepDB	2	pos	5.18062e+07	5.42877e+07	3.95887e+07	3.83693e+07	3.37267e+07	1.43116e+07	1.04383e+07	3.08672e+07
M296T83	Dehypoxanthine futalosine	296.064	82.8	296.09	7.14471	C14H16O7	[M]+			C17010	Metabolism of cofactors and vitamins			BioDeepDB	2	pos	4.34397e+07	2.37049e+07	3.02992e+07	3.33933e+07	4.66022e+07	3.1944e+07	4.38894e+07	2.93165e+07
M280T336	Cyclopeptine	280.13	335.6	280.121	0.0232698	C17H16N2O2	[M]+			C20579		50886-63-0		BioDeepDB	2	pos	8.16432e+06	7.24116e+06	7.8628e+06	9.17725e+06	8.69798e+06	4.37257e+06	1.00127e+07	6.49669e+06
M299T311	D-4'-Phosphopantothenate	299.08	310.8	299.077	0.227366	C9H18NO8P	[M]+	Carboxylic acids and derivatives	Amino acids, peptides, and analogues	C03492	Metabolism of cofactors and vitamins; Metabolism of other amino acids	5875-50-3	HMDB0001016	BioDeepDB	2	pos	2.78967e+06	1.41622e+07	1.08562e+07	1.22809e+07	1.12307e+07	1.32597e+07	3.22528e+06	3.35761e+06
M288T87	Indoleglycerol phosphate	288.073	86.7	287.056	5.59886	C11H14NO6P	[M+H]+			C03506	Amino acid metabolism	4220-97-7		BioDeepDB	2	pos	1.58683e+08	3.12162e+08	3.23196e+08	4.03138e+08	6.43272e+07	2.96077e+08	3.94459e+08	4.0306e+08
M289T580	N-Succinyl-2-amino-6-ketopimelate	289.069	580.3	289.08	4.58445	C11H15NO8	[M]+	Carboxylic acids and derivatives	Amino acids, peptides, and analogues	C04462			HMDB0012266	BioDeepDB	2	pos	1.71805e+06	802872	1.40911e+06	2.00026e+06	268127	1.06719e+06	2.21317e+06	435530
M291T84	Argininosuccinic acid	291.128	84.2	290.123	6.20263	C10H18N4O6	[M+H]+	Carboxylic acids and derivatives	Amino acids, peptides, and analogues	C03406	Amino acid metabolism	2387-71-5	HMDB0000052	BioDeepDB	2	pos	1.0187e+08	4.12148e+07	9.54262e+07	1.3412e+08	8.45671e+07	1.12204e+08	3.25345e+08	1.59701e+07
M292T103	N-Acetyl-a-neuraminic acid	292.101	102.7	309.106	4.41542	C11H19NO9	[M+H-H2O]+	Organooxygen compounds	Carbohydrates and carbohydrate conjugates	C19909		21646-00-4	HMDB0000773	BioDeepDB	2	pos	6.26926e+06	1.81114e+08	1.12214e+07	8.97775e+06	1.41965e+07	3.34162e+07	8.10065e+06	2.48261e+07
M295T416	Aspartame	295.127	415.9	294.122	5.14241	C14H18N2O5	[M+H]+	Carboxylic acids and derivatives	Amino acids, peptides, and analogues	C11045	Sensory system	22839-47-0	HMDB0001894	BioDeepDB	2	pos	4.86284e+07	5.77203e+07	8.39438e+07	5.7314e+07	4.25954e+07	5.48287e+07	4.44179e+07	3.12072e+07
M297T162	7,8-Dihydropteroic acid	297.106	162	314.113	2.4705	C14H14N6O3	[M+H-H2O]+	Pteridines and derivatives	Pterins and derivatives	C00921	Metabolism of cofactors and vitamins	2134-76-1	HMDB0001412	BioDeepDB	2	pos	2.41897e+07	2.53426e+07	2.26929e+07	1.86257e+07	9.79822e+07	3.5128e+07	4.50527e+07	3.20543e+07
M304T119	Nopaline	304.149	118.6	304.138	3.90917	C11H20N4O6	[M]+			C01682	Amino acid metabolism; Membrane transport	22350-70-5		BioDeepDB	2	pos	1.65279e+08	1.04011e+08	1.52264e+08	2.60404e+08	1.55855e+08	1.17586e+08	1.27332e+08	1.94853e+08
M304T160	Nicotianamine	304.149	160.2	303.143	4.19531	C12H21N3O6	[M+H]+			C05324		34441-14-0		BioDeepDB	2	pos	1.67609e+07	1.15993e+07	2.40094e+07	3.27019e+07	2.75391e+07	2.565e+07	3.545e+07	1.5344e+07
M316T694	Decanoyl-L-carnitine	316.247	694.5	315.241	1.60953	C17H33NO4	[M+H]+			C03299		3992-45-8	HMDB00651	BioDeepDB	2	pos	3.99696e+06	4.35672e+06	4.55182e+06	3.89501e+06	5.66264e+06	5.24139e+06	4.17024e+06	5.11382e+06
M335T623	12-Keto-leukotriene B4	335.221	622.6	334.214	2.91151	C20H30O4	[M+H]+	Fatty Acyls	Eicosanoids	C05949	Lipid metabolism	136696-10-1	HMDB0004234	BioDeepDB	2	pos	2.81292e+07	7.92366e+06	1.9633e+07	3.17309e+07	5.55044e+07	1.92486e+07	2.28729e+07	5.77798e+06
M337T82	Kyotorphin	337.171	81.7	337.175	0.104335	C15H23N5O4	[M]+	Carboxylic acids and derivatives	Amino acids, peptides, and analogues	C02993		70904-56-2	HMDB0005768	BioDeepDB	2	pos	1.29638e+08	7.29616e+07	3.67986e+07	7.44595e+07	5.32005e+07	3.38641e+07	7.82679e+07	5.68784e+07
M346T433	L-Alanyl-gamma-D-glutamyl-L-lysine	346.196	433.1	346.185	2.61009	C14H26N4O6	[M]+			C21160				BioDeepDB	2	pos	4.80954e+07	6.75296e+07	6.51854e+06	6.33108e+07	2.03452e+07	2.95659e+07	5.68789e+07	2.88124e+07
M335T708	Prostaglandin-c2	335.221	708.4	334.214	2.60204	C20H30O4	[M+H]+	Fatty Acyls	Eicosanoids	C05955	Lipid metabolism; Nervous system	49825-91-4	HMDB0060095	BioDeepDB	2	pos	8.33776e+06	9.55351e+06	6.2032e+06	6.51458e+06	5.18859e+06	3.6961e+06	9.48134e+06	1.32895e+06
M336T512	Isopentenyl adenosine	336.164	512.1	335.159	5.49179	C15H21N5O4	[M+H]+			C16427		7724-76-7		BioDeepDB	2	pos	4.62537e+07	3.8649e+07	5.96947e+07	7.37627e+07	1.1049e+08	1.1014e+08	7.29813e+07	5.62784e+07
M347T721	Cortexolone	347.221	720.9	346.214	0.00547246	C21H30O4	[M+H]+	Steroids and steroid derivatives	Hydroxysteroids	C05488	Lipid metabolism; Endocrine and metabolic disease; Endocrine system	152-58-9	HMDB0000015	BioDeepDB	2	pos	4.46657e+06	1.01155e+06	1.08468e+06	3.80342e+06	6.70109e+06	4.04089e+06	3.95779e+06	3.43356e+06
M353T623_1	Prostaglandin I2	353.23	622.6	352.225	0.160914	C20H32O5	[M+H]+			C01312	Circulatory system; Signal transduction; Lipid metabolism; Signaling molecules and interaction; Immune system	35121-78-9		BioDeepDB	2	pos	6.06601e+07	2.71013e+08	3.13523e+08	8.9022e+07	1.92703e+08	9.3021e+07	4.59406e+07	4.94495e+07
M361T548	Nitrendipine	361.138	547.6	360.132	2.39085	C18H20N2O6	[M+H]+	Pyridines and derivatives	Hydropyridines	C07713		39562-70-4 / 84845-75-0	HMDB0015187	BioDeepDB	2	pos	5.95913e+06	1.15694e+07	5.62791e+06	1.07066e+07	1.15595e+07	1.11047e+07	1.08988e+07	1.59962e+07
M361T818	1-Arachidonoylglycerol	361.272	817.6	378.277	3.03273	C23H38O4	[M+H-H2O]+			C13857		124511-15-5 / 35474-99-8		BioDeepDB	2	pos	4.07867e+07	4.78926e+07	4.61776e+07	4.86124e+07	5.66788e+07	3.94051e+07	4.84305e+07	4.7221e+07
M400T794_2	Palmitoyl-L-carnitine	400.34	794	399.335	5.00394	C23H45NO4	[M+H]+			C02990	Lipid metabolism	2364-67-2		BioDeepDB	2	pos	1.42609e+09	1.11401e+09	1.4151e+09	5.18701e+08	4.54888e+08	7.59109e+08	9.5407e+08	2.32677e+08
M413T321	6-Amino-6-deoxyfutalosine	413.121	320.7	413.134	5.49914	C19H19N5O6	[M]+			C20773	Metabolism of cofactors and vitamins			BioDeepDB	2	pos	2.58801e+07	5.11577e+06	2.69952e+07	2.78242e+07	7.88339e+07	2.40384e+07	2.65901e+07	3.35791e+07
M432T454	Gentamicin C1a	432.277	453.5	449.285	1.77201	C19H39N5O7	[M+H-H2O]+			C00908	Biosynthesis of other secondary metabolites	26098-04-4		BioDeepDB	2	pos	9.83182e+06	1.76316e+07	2.09816e+07	2.50323e+07	2.8336e+07	1.29048e+07	2.12734e+07	2.82373e+07
M462T666	3-Dehydroecdysone	462.265	665.9	462.298	3.81299	C27H42O6	[M]+			C02513		39750-00-0		BioDeepDB	2	pos	870347	543795	678388	1.02415e+06	824615	877090	942790	772571
M482T738	Antibiotic JI-20A	482.33	737.7	481.275	11.1691	C19H39N5O9	[M+H]+			C17704	Biosynthesis of other secondary metabolites	51846-97-0		BioDeepDB	2	pos	1.15858e+08	6.76661e+07	3.38986e+07	1.44252e+08	4.91097e+07	3.75717e+07	6.96545e+07	2.55489e+07
M476T801_1	Retinoyl b-glucuronide	476.272	801.3	476.241	7.84093	C26H36O8	[M]+	Prenol lipids	Terpene glycosides	C11061	Metabolism of cofactors and vitamins	401-10-5	HMDB0003141	BioDeepDB	2	pos	5.51323e+06	5.93489e+07	2.1001e+06	4.67732e+06	1.46431e+07	1.91351e+07	5.22528e+06	2.74798e+06
M480T666	26-Hydroxyecdysone	480.274	665.7	480.309	6.8028	C27H44O7	[M]+			C16499		52717-49-4		BioDeepDB	2	pos	879098	489170	1.43752e+06	1.59571e+06	430827	1.88262e+06	2.06207e+06	1.53735e+06
M498T678	Taurocholic acid	498.289	677.9	515.292	0.06113	C26H45NO7S	[M+H-H2O]+	Steroids and steroid derivatives	Bile acids, alcohols and derivatives	C05122	Lipid metabolism; Metabolism of other amino acids; Digestive system	81-24-3	HMDB0000036	BioDeepDB	2	pos	9.20601e+06	4.36022e+07	6.30734e+06	5.12889e+06	7.05994e+06	1.80922e+06	1.60326e+06	6.26339e+06
M568T823	Protoporphyrinogen IX	568.331	823.4	568.305	9.28332	C34H40N4O4	[M-H2O+NH4]+	Tetrapyrroles and derivatives	Porphyrins	C01079	Metabolism of cofactors and vitamins	7412-77-3	HMDB0001097	BioDeepDB	2	pos	3.28102e+09	2.08276e+09	1.35071e+09	4.49883e+09	1.71377e+09	1.6409e+09	8.62181e+09	9.73281e+08
M567T832_1	Avermectin A1b aglycone	567.32	831.6	584.335	13.6889	C34H48O8	[M+H-H2O]+			C11964				BioDeepDB	2	pos	1.47749e+07	4.61625e+06	7.98905e+06	1.08488e+07	2.90198e+07	1.45635e+07	6.70345e+06	2.67065e+07
M212T491	L-Aspartyl-4-phosphate	212.002	491.4	213.004	25.8306	C4H8NO7P	[M-H]-	Carboxylic acids and derivatives	Amines	C03082	Amino acid metabolism	22138-53-0	HMDB0012250	MetaDNA	2	neg	136340	254543	215906	1.44434e+06	110285	103486	269179	101225
M251T254	Deoxyinosine	251.078	254.4	252.086	1.29043	C10H12N4O4	[M-H]-	Azacyclic compounds	Alcohols and polyols	C05512	Membrane transport; Nucleotide metabolism	890-38-0	HMDB0000071	MetaDNA	2	neg	1.03316e+06	2.34095e+07	7.85674e+06	1.87151e+06	3.14004e+06	3.08975e+06	1.35295e+06	3.32449e+06
M297T392	5'-S-Methyl-5'-thioinosine	297.065	391.5	298.074	4.79354	C11H14N4O4S	[M-H]-			C19787	Amino acid metabolism	17298-58-7		MetaDNA	2	neg	428223	3.66603e+06	739652	44713.1	1.16327e+06	249032	10507.5	1999.8
M439T475	S-[(Z)-N-Hydroxy(phenyl)acetimidoyl]-L-glutathione	439.128	474.9	440.137	3.24278	C18H24N4O7S	[M-H]-			C21622				MetaDNA	2	neg	34489.5	5.87602e+06	1.54621e+06	881718	250068	3463.32	26359.5	25450.3
M424T406	Dihydrofolic acid	424.145	406	443.155	19.7813	C19H21N7O6	[M-H2O-H]-	Azacyclic compounds	Amines	C00415	Metabolism of cofactors and vitamins	4033-27-6	HMDB0001056	MetaDNA	2	neg	675438	4.68566e+06	1.679e+06	1.32853e+06	1.2578e+06	1.11357e+06	741560	1.23259e+06
M165T672	D-Phenyllactic acid	165.056	671.6	166.063	0.145405	C9H10O3	[M-H]-	Benzene and substituted derivatives	Alcohols and polyols	C05607	Amino acid metabolism	7326-19-4/20312-36-1	HMDB0000563	MetaDNA	2	neg	8.16428e+06	1.58191e+07	3.76049e+06	4.91159e+06	7.96712e+06	4.78394e+06	8.38536e+06	9.9058e+06
M208T382	L-Arogenate	208.061	382.1	227.079	0.0480628	C10H13NO5	[M-H2O-H]-	Carboxylic acids and derivatives	Alcohols and polyols	C00826	Amino acid metabolism	53078-86-7		MetaDNA	2	neg	5.14639e+06	4.53595e+07	5.81735e+07	1.95876e+07	1.91765e+06	1.38721e+06	2.35807e+06	2.00032e+06
M174T121	1H-Indole-3-acetamide	174.077	121.2	174.079	14.9357	C10H10N2O	[M]-	Azacyclic compounds	Carboximidic acids	C02693	Amino acid metabolism	879-37-8	HMDB0029739	MetaDNA	2	neg	1.49912e+06	3.09169e+07	8.87694e+06	8.13636e+06	7.62184e+06	3.01811e+06	1.46932e+06	2.19157e+06
M203T367	Tryptophanamide	203.111	367.2	203.106	22.6483	C11H13N3O	[M]-	Azacyclic compounds	Amines	C00977		20696-57-5	HMDB0013318	MetaDNA	2	neg	5.07165e+06	6.85344e+07	1.09721e+07	1.91799e+07	6.75169e+06	6.82877e+06	6.58911e+06	9.48633e+06
M322T580	Digallate	322.024	579.9	322.033	26.3949	C14H10O9	[M]-	Benzene and substituted derivatives	1-hydroxy-2-unsubstituted benzenoids	C01572		536-08-3		MetaDNA	2	neg	211265	47242.6	859539	1.3906e+06	794831	731791	888391	145128
M166T199	Pyridoxal	166.051	199.3	167.058	1.95121	C8H9NO3	[M-H]-	Azacyclic compounds	Alcohols and polyols	C00250	Metabolism of cofactors and vitamins; Digestive system	66-72-8	HMDB0001545	MetaDNA	2	neg	2.7562e+06	1.95294e+06	2.02276e+06	3.21528e+06	1.41437e+06	1.68335e+06	1.71418e+06	3.72235e+06
M178T437	Gluconolactone	178.05	436.8	178.048	11.7946	C6H10O6	[M]-	Carboxylic acids and derivatives	Alcohols and polyols	C00198	Carbohydrate metabolism	90-80-2	HMDB0000150	MetaDNA	2	neg	1.10458e+06	5.06766e+06	836782	1.59245e+06	1.69649e+06	2.36837e+06	625385	1.99922e+06
M310T93	trans-Cinnamoyl beta-D-glucoside	310.113	92.9	310.105	25.7977	C15H18O7	[M]-	Benzene and substituted derivatives	Alcohols and polyols	C04164				MetaDNA	2	neg	1.17164e+08	1.57164e+08	1.24835e+08	1.29868e+08	4.02504e+07	3.24431e+07	1.55291e+06	3.27245e+07
M222T254	6-Acetyl-D-glucose	222.077	254.3	222.074	13.0587	C8H14O7	[M]-	Carboxylic acids and derivatives	Alcohols and polyols	C02655				MetaDNA	2	neg	1.09193e+06	6.97174e+06	1.67975e+06	2.10168e+06	830153	908683	1.07218e+06	418568
M342T128	D-Maltose	342.118	127.7	342.116	5.26137	C12H22O11	[M]-	Organooxygen compounds	Alcohols and polyols	C00208	Carbohydrate metabolism; Membrane transport; Sensory system; Digestive system	69-79-4	HMDB0000163	MetaDNA	2	neg	8.1164e+07	2.59962e+07	3.35044e+07	6.90766e+07	5.10316e+06	6.86713e+06	1.41625e+07	1.6923e+07
M129T328	Ketoleucine	129.056	328.1	130.063	0.960825	C6H10O3	[M-H]-	Carboxylic acids and derivatives	Alpha-keto acids and derivatives	C00233	Amino acid metabolism	816-66-0	HMDB0000695	MetaDNA	2	neg	2.04124e+07	3.34245e+07	1.30494e+07	1.7736e+07	2.56105e+07	1.75592e+07	1.73784e+07	1.73979e+07
M311T86	Dhurrin	311.108	85.6	311.101	23.1436	C14H17NO7	[M]-	Benzene and substituted derivatives	1-hydroxy-2-unsubstituted benzenoids	C05143		499-20-7	HMDB0060471	MetaDNA	2	neg	1.98481e+07	3.70904e+06	1.58682e+07	2.5961e+07	7.28372e+06	7.86158e+06	1.86898e+07	660764
M340T176	3'-Ketolactose	340.102	176	340.101	4.99852	C12H20O11	[M]-	Organic oxides	Alcohols and polyols	C05403		15990-62-2	HMDB0001030	MetaDNA	2	neg	1.04506e+07	9.91188e+06	7.77594e+06	9.90592e+06	1.19427e+07	1.67522e+07	7.69379e+06	6.94882e+06
M259T450	Beta-D-Glucose 6-phosphate	259.028	449.8	260.03	22.2992	C6H13O9P	[M-H]-	Organic oxides	Alcohols and polyols	C01172	Carbohydrate metabolism; Signal transduction; Endocrine system		HMDB0003498	MetaDNA	2	neg	258105	255267	420472	431932	502157	302612	357303	412740
M383T155	Acetyl-maltose	383.121	154.6	384.127	4.37461	C14H24O12	[M-H]-	Carboxylic acids and derivatives	Alcohols and polyols	C02130				MetaDNA	2	neg	4.45304e+06	2.25483e+07	4.0237e+06	5.34846e+06	1.01991e+07	9.1303e+06	4.62336e+06	6.3759e+06
M147T99_1	D-Xylonate	147.03	98.6	166.048	3.33267	C5H10O6	[M-H2O-H]-	Carboxylic acids and derivatives	Alcohols and polyols	C00502	Carbohydrate metabolism	526-91-0	HMDB0059750	MetaDNA	2	neg	1.61831e+07	4.95091e+07	2.20826e+07	1.73568e+07	1.28013e+07	1.30598e+07	1.72544e+07	2.16355e+07
M173T104	Formiminoglutamic acid	173.057	103.7	174.064	0.716528	C6H10N2O4	[M-H]-	Carboxylic acids and derivatives	Amidines	C00439	Amino acid metabolism	816-90-0	HMDB0000854	MetaDNA	2	neg	9.90609e+06	6.95639e+06	7.34404e+06	6.58513e+06	5.93089e+06	5.74022e+06	6.82986e+06	3.53206e+06
M506T89	ATP	505.987	88.8	506.996	3.40719	C10H16N5O13P3	[M-H]-	Azacyclic compounds	Alcohols and polyols	C00002	Endocrine and metabolic disease; Transport and catabolism; Signal transduction; Cell growth and death; Nervous system; Sensory system; Environmental adaptation; Endocrine system; Neurodegenerative disease; Cardiovascular disease; Signaling molecules and interaction; Nucleotide metabolism; Energy metabolism; Immune system	56-65-5/987-65-5	HMDB0000538	MetaDNA	2	neg	1.08331e+06	9.97547e+07	1.72705e+07	4.30611e+06	1.72539e+07	7.74151e+06	3.30891e+06	1.42942e+07
M375T95	XE991	375.152	95	376.158	3.66786	C26H20N2O	[M-H]-	Anthracenes	Carbonyl compounds	C13779				MetaDNA	2	neg	1.2513e+07	9.85011e+07	3.97821e+07	3.87235e+07	1.09533e+07	2.2112e+07	8.86655e+06	9.41259e+06
M331T468	Vomilenine	331.151	468	350.163	18.9947	C21H22N2O3	[M-H2O-H]-	Ajmaline-sarpagine alkaloids	Amines	C01761		6880-50-8		MetaDNA	2	neg	2.66019e+07	1.59494e+07	2.9983e+07	3.32739e+07	1.08083e+07	1.47812e+07	2.74188e+07	1.52038e+07
M101T300	Ethylmethylacetic acid	101.025	299.6	102.068	18.8055	C5H10O2	[M-H]-	Fatty Acyls	Fatty acids and conjugates	C18319	Digestive system	116-53-0	HMDB0002176	BioDeepDB	2	neg	9.96819e+07	4.9898e+07	2.1474e+07	7.4295e+07	5.87975e+07	4.7541e+07	1.13739e+08	4.04945e+07
M103T89	Malonate	102.957	88.9	104.011	9.97295	C3H4O4	[M-H]-			C00383	Lipid metabolism; Metabolism of other amino acids; Nucleotide metabolism	141-82-2 / 156-80-9		BioDeepDB	2	neg	2.10582e+07	3.981e+07	1.01058e+07	6.851e+06	2.16439e+07	3.79583e+07	1.95463e+07	4.99272e+07
M103T94	(R)-3-Hydroxybutyric acid	103.04	93.6	104.047	3.14442	C4H8O3	[M-H]-	Hydroxy acids and derivatives	Beta hydroxy acids and derivatives	C01089	Carbohydrate metabolism; Signal transduction	625-72-9 / 300-85-6	HMDB0000011	BioDeepDB	2	neg	2.38858e+08	2.71041e+08	9.38597e+07	1.73089e+08	1.55084e+08	4.36842e+07	9.31395e+07	1.74989e+08
M105T79	Glyceric acid	105.019	79	106.027	2.13295	C3H6O4	[M-H]-	Organooxygen compounds	Carbohydrates and carbohydrate conjugates	C00258	Carbohydrate metabolism; Amino acid metabolism; Lipid metabolism	473-81-4	HMDB0000139	BioDeepDB	2	neg	2.37574e+07	2.00652e+07	2.17935e+07	2.16329e+07	2.38702e+07	2.88345e+07	2.76087e+07	1.32784e+07
M128T131	Pyroglutamic acid	128.035	131	129.043	1.70233	C5H7NO3	[M-H]-	Carboxylic acids and derivatives	Amino acids, peptides, and analogues	C01879	Metabolism of other amino acids	98-79-3	HMDB0000267	BioDeepDB	2	neg	9.3661e+06	8.93311e+06	6.53897e+06	7.19331e+06	6.55222e+06	1.43781e+07	1.00351e+07	1.03047e+07
M113T116	Creatinine	112.986	116.3	113.059	9.68693	C4H7N3O	[M]-	Carboxylic acids and derivatives	Amino acids, peptides, and analogues	C00791	Amino acid metabolism	60-27-5	HMDB0000562	BioDeepDB	2	neg	5.37811e+07	1.2939e+08	8.8441e+07	3.52925e+07	1.6399e+07	7.01106e+07	6.91632e+07	6.95298e+07
M131T78	Glutaric acid	131.034	78.2	132.042	0.545113	C5H8O4	[M-H]-	Carboxylic acids and derivatives	Dicarboxylic acids and derivatives	C00489	Lipid metabolism; Amino acid metabolism	110-94-1	HMDB0000661	BioDeepDB	2	neg	1.27509e+07	2.22054e+07	6.33324e+06	1.41537e+07	5.43732e+06	3.21245e+06	1.46202e+07	9.27956e+06
M114T116	Dihydrouracil	113.989	116.3	114.043	10.7157	C4H6N2O2	[M]-	Diazines	Pyrimidines and pyrimidine derivatives	C00429	Metabolism of cofactors and vitamins; Metabolism of other amino acids; Nucleotide metabolism	504-07-4	HMDB0000076	BioDeepDB	2	neg	1.60223e+06	2.26466e+06	1.42154e+06	1.44076e+06	282163	297876	257959	259373
M115T72_2	Fumaric acid	115.004	72.3	116.011	1.94777	C4H4O4	[M-H]-	Carboxylic acids and derivatives	Dicarboxylic acids and derivatives	C00122	Cancer: overview; Metabolism of cofactors and vitamins; Endocrine system; Carbohydrate metabolism; Cancer: specific types; Amino acid metabolism; Energy metabolism	110-17-8	HMDB0000134	BioDeepDB	2	neg	2.24614e+08	3.22315e+08	3.88531e+08	3.72277e+08	1.26171e+08	3.59808e+08	3.74328e+08	3.64426e+08
M116T72	Maleic acid	116.007	72.3	116.011	9.6229	C4H4O4	[M]-			C01384	Carbohydrate metabolism; Amino acid metabolism; Metabolism of cofactors and vitamins	110-16-7		BioDeepDB	2	neg	5.16611e+06	4.7269e+06	5.1344e+06	5.86758e+06	4.52218e+06	3.6256e+06	5.78497e+06	3.91416e+06
M116T106	L-Valine	116.072	105.9	117.079	1.06831	C5H11NO2	[M-H]-	Carboxylic acids and derivatives	Amino acids, peptides, and analogues	C00183	Cancer: overview; Metabolism of cofactors and vitamins; Membrane transport; Digestive system; Translation; Amino acid metabolism	72-18-4	HMDB0000883	BioDeepDB	2	neg	3.11948e+08	6.6211e+07	1.68827e+08	2.77888e+08	1.66079e+08	8.63764e+07	2.18207e+08	1.9326e+08
M117T74	Succinic acid	117.019	74.4	118.027	2.17011	C4H6O4	[M-H]-	Carboxylic acids and derivatives	Dicarboxylic acids and derivatives	C00042	Cancer: overview; Metabolism of cofactors and vitamins; Nervous system; Signal transduction; Endocrine system; Carbohydrate metabolism; Amino acid metabolism; Energy metabolism	110-15-6	HMDB0000254	BioDeepDB	2	neg	1.91436e+08	3.68596e+08	1.87049e+08	1.23568e+08	1.93105e+08	1.487e+08	1.95053e+08	2.75201e+08
M121T485	Erythritol	121.029	485.2	122.058	8.9986	C4H10O4	[M-H]-			C00503	Membrane transport	149-32-6		BioDeepDB	2	neg	1.03031e+07	1.17204e+07	8.86002e+06	7.95689e+06	9.12728e+06	8.76239e+06	1.04342e+07	1.03717e+07
M121T538	Phenylethylamine	121.066	537.6	121.089	16.8598	C8H11N	[M]-	Benzene and substituted derivatives	Phenethylamines	C05332	Amino acid metabolism	64-04-0	HMDB0012275	BioDeepDB	2	neg	90954.9	1.1648e+06	10276.4	271312	443419	601440	206198	122170
M144T107_2	4-Acetamidobutanoic acid	144.067	107	145.074	0.16659	C6H11NO3	[M-H]-	Carboxylic acids and derivatives	Amino acids, peptides, and analogues	C02946	Amino acid metabolism	3025-96-5	HMDB0003681	BioDeepDB	2	neg	9.08261e+06	8.61486e+06	6.20557e+06	6.53177e+06	6.70842e+06	5.62513e+06	7.12463e+06	6.90799e+06
M145T93	L-Glutamine	145.062	93.3	146.069	0.523914	C5H10N2O3	[M-H]-	Carboxylic acids and derivatives	Amino acids, peptides, and analogues	C00064	Cancer: overview; Metabolism of cofactors and vitamins; Membrane transport; Nervous system; Excretory system; Digestive system; Carbohydrate metabolism; Nucleotide metabolism; Translation; Amino acid metabolism; Energy metabolism	56-85-9	HMDB0000641	BioDeepDB	2	neg	5.54709e+07	5.99929e+07	6.1395e+07	6.55985e+07	5.83952e+07	5.88769e+07	6.34073e+07	5.44523e+07
M130T92	Creatine	130.062	92.2	131.07	1.72226	C4H9N3O2	[M-H]-	Carboxylic acids and derivatives	Amino acids, peptides, and analogues	C00300	Amino acid metabolism	57-00-1	HMDB0000064	BioDeepDB	2	neg	4.55808e+08	1.50264e+08	2.52891e+08	2.41526e+08	1.74707e+08	8.0612e+07	1.43631e+08	4.74157e+07
M131T85	L-Asparagine	131.083	85	132.054	20.0544	C4H8N2O3	[M-H]-	Carboxylic acids and derivatives	Amino acids, peptides, and analogues	C00152	Cancer: overview; Amino acid metabolism; Digestive system; Translation	2058-58-4	HMDB0033780	BioDeepDB	2	neg	2.50058e+07	2.56945e+07	2.79719e+07	3.11624e+07	2.83009e+07	2.79346e+07	3.56726e+07	2.00937e+07
M132T77	L-Aspartic acid	132.03	77.3	133.037	0.93918	C4H7NO4	[M-H]-	Carboxylic acids and derivatives	Amino acids, peptides, and analogues	C00049	Cancer: overview; Metabolism of cofactors and vitamins; Metabolism of other amino acids; Membrane transport; Digestive system; Signaling molecules and interaction; Translation; Amino acid metabolism	56-84-8	HMDB0000191	BioDeepDB	2	neg	5.03015e+08	2.24655e+08	5.73289e+08	8.41007e+08	4.14306e+08	1.27244e+08	7.26172e+08	1.32344e+08
M133T106	L-Malic acid	133.014	105.7	134.022	0.571367	C4H6O5	[M-H]-	Hydroxy acids and derivatives	Beta hydroxy acids and derivatives	C00149	Cancer: overview; Sensory system; Excretory system; Endocrine system; Carbohydrate metabolism; Cancer: specific types	97-67-6 / 6915-15-7	HMDB0000156	BioDeepDB	2	neg	2.05177e+07	6.63247e+07	1.27525e+07	3.86351e+06	1.56525e+07	640189	613889	2.13594e+06
M134T253	Adenine	134.046	253.2	135.054	6.11102	C5H5N5	[M-H]-	Imidazopyrimidines	Purines and purine derivatives	C00147	Nucleotide metabolism	73-24-5	HMDB0000034	MoNA	2	neg	3.2371e+07	1.15579e+07	3.11667e+06	1.70602e+07	6.01721e+06	2.82572e+06	1.45702e+07	1.11082e+07
M136T658	Phenyl acetate	135.97	657.7	136.052	0.768497	C8H8O2	[M]-			C00548		122-79-2		BioDeepDB	2	neg	3.51252e+06	5.28204e+06	1.74253e+06	1.49716e+06	2.4708e+06	8.48256e+06	1.47347e+06	1.76053e+06
M140T77	O-Phosphoethanolamine	140.012	77	141.019	1.59987	C2H8NO4P	[M-H]-	Organic phosphoric acids and derivatives	Phosphate esters	C00346	Lipid metabolism; Signal transduction	1071-23-4	HMDB0000224	BioDeepDB	2	neg	3.48971e+07	3.87647e+07	4.51534e+07	4.92484e+07	2.34911e+07	1.85337e+07	3.0614e+07	2.40038e+07
M159T116	Oxoadipic acid	158.978	116.2	160.037	7.82026	C6H8O5	[M-H]-	Keto acids and derivatives	Medium-chain keto acids and derivatives	C00322	Amino acid metabolism	3184-35-8	HMDB0000225	BioDeepDB	2	neg	4.42509e+07	1.70296e+08	6.54627e+07	8.74488e+06	5.39148e+06	7.8556e+06	5.77988e+06	6.96511e+07
M160T98	Aminoadipic acid	160.061	98.3	161.069	1.39946	C6H11NO4	[M-H]-	Carboxylic acids and derivatives	Amino acids, peptides, and analogues	C00956	Amino acid metabolism	542-32-5 / 1118-90-7	HMDB0000510	BioDeepDB	2	neg	1.93667e+07	4.81384e+08	1.44848e+08	5.76192e+07	9.89602e+07	3.88639e+07	1.42287e+07	3.4409e+07
M146T77	L-Glutamic acid	146.046	77.3	147.053	0.849049	C5H9NO4	[M-H]-	Carboxylic acids and derivatives	Amino acids, peptides, and analogues	C00025	Neurodegenerative disease; Biosynthesis of other secondary metabolites; Translation; Substance dependence; Cellular community - eukaryotes; Energy metabolism; Metabolism of other amino acids; Excretory system; Carbohydrate metabolism; Cancer: overview; Membrane transport; Cell growth and death; Signal transduction; Nervous system; Digestive system; Environmental adaptation; Amino acid metabolism;…	56-86-0	HMDB0000148	BioDeepDB	2	neg	4.12836e+08	5.13673e+08	1.50857e+09	7.5683e+08	3.11434e+09	7.7135e+08	5.9277e+08	3.25352e+08
M147T697	trans-Cinnamate	146.965	696.9	148.052	2.18117	C9H8O2	[M-H]-			C00423	Amino acid metabolism; Metabolism of cofactors and vitamins	140-10-3		BioDeepDB	2	neg	3.58634e+07	1.13354e+07	2.30618e+07	2.44679e+07	7.22231e+07	9.82974e+07	2.41625e+07	4.19104e+07
M148T122	L-Methionine	148.044	121.7	149.051	0.837591	C5H11NO2S	[M-H]-	Carboxylic acids and derivatives	Amino acids, peptides, and analogues	C00073	Cancer: overview; Amino acid metabolism; Digestive system; Translation	63-68-3	HMDB0000696	BioDeepDB	2	neg	2.56024e+08	8.37134e+08	2.80278e+08	2.95624e+08	1.22531e+08	1.94002e+08	2.58429e+08	3.18981e+08
M149T95	D-Ribose	149.045	94.6	150.053	2.17384	C5H10O5	[M-H]-	Organooxygen compounds	Carbohydrates and carbohydrate conjugates	C00121	Carbohydrate metabolism; Membrane transport	613-83-2 / 50-69-1	HMDB0000283	BioDeepDB	2	neg	7.00933e+06	7.07066e+07	1.04911e+07	7.23718e+06	3.60738e+07	3.56571e+07	3.75446e+07	5.13641e+07
M151T88	D-Xylitol	151.061	88.4	152.069	1.48284	C5H12O5	[M-H]-	Organooxygen compounds	Carbohydrates and carbohydrate conjugates	C00379	Carbohydrate metabolism; Membrane transport	87-99-0	HMDB0002917	BioDeepDB	2	neg	3.51911e+07	5.95687e+07	6.64053e+07	6.81598e+07	3.23368e+07	1.32996e+07	8.771e+06	6.47672e+07
M151T97	D-Arabitol	151.061	96.9	152.069	2.14483	C5H12O5	[M-H]-	Organooxygen compounds	Carbohydrates and carbohydrate conjugates	C01904	Carbohydrate metabolism	488-82-4	HMDB0000568	BioDeepDB	2	neg	1.04218e+07	8.07146e+06	1.0869e+07	1.42687e+07	8.35942e+06	8.08306e+06	1.30917e+07	7.61921e+06
M153T433	Gentisic acid	153.019	432.8	154.027	0.496669	C7H6O4	[M-H]-	Benzene and substituted derivatives	Benzoic acids and derivatives	C00628	Amino acid metabolism	490-79-9	HMDB0000152	BioDeepDB	2	neg	2.12671e+07	7.08009e+06	6.25475e+06	3.83036e+06	1.86512e+06	278738	1.0057e+06	1.32705e+06
M154T91	L-Histidine	154.062	90.5	155.07	0.80487	C6H9N3O2	[M-H]-	Carboxylic acids and derivatives	Amino acids, peptides, and analogues	C00135	Cancer: overview; Membrane transport; Metabolism of other amino acids; Digestive system; Translation; Amino acid metabolism	71-00-1	HMDB0000177	BioDeepDB	2	neg	3.23088e+08	2.64051e+08	2.65745e+08	2.89512e+08	2.56529e+08	2.75571e+08	3.24643e+08	3.00496e+08
M173T105	Dehydroascorbate	173.009	105.4	174.016	0.716726	C6H6O6	[M-H]-			C05422	Carbohydrate metabolism; Metabolism of other amino acids	490-83-5		BioDeepDB	2	neg	2.13699e+07	2.18574e+07	2.47704e+07	2.12471e+07	1.99496e+07	1.64952e+07	1.6098e+07	1.92732e+07
M175T373_2	D-Glucurono-6,3-lactone	175.025	372.7	176.032	0.708471	C6H8O6	[M-H]-	Furofurans	Isosorbides	C02670	Carbohydrate metabolism	32449-92-6	HMDB0006355	BioDeepDB	2	neg	3.06142e+06	802774	1.43145e+06	1.93443e+06	1.77604e+06	1.44515e+06	1.65708e+06	1.49016e+06
M178T333	Hippuric acid	178.051	333.4	179.058	1.81971	C9H9NO3	[M-H]-	Benzene and substituted derivatives	Benzoic acids and derivatives	C01586	Amino acid metabolism	495-69-2	HMDB0000714	BioDeepDB	2	neg	7.42492e+08	6.65992e+08	6.61451e+08	6.45296e+08	6.8534e+08	6.46717e+08	7.23639e+08	6.85691e+08
M180T95	D-Mannose	180.059	95.3	180.063	5.44797	C6H12O6	[M]-	Organooxygen compounds	Carbohydrates and carbohydrate conjugates	C00159	Carbohydrate metabolism; Immune system; Membrane transport; Transport and catabolism	3458-28-4 / 3458-28-4 31103-86-3 / 530-26-7	HMDB0000169	BioDeepDB	2	neg	3.50843e+06	3.62463e+06	4.35859e+06	1.30661e+07	8.92854e+06	4.05917e+06	1.05323e+07	6.90587e+06
M179T176	myo-Inositol	179.056	176	180.063	0	C6H12O6	[M-H]-	Organooxygen compounds	Alcohols and polyols	C00137	Carbohydrate metabolism; Membrane transport; Signal transduction	87-89-8/87-9-8	HMDB0000211	BioDeepDB	2	neg	9.86799e+06	1.09697e+07	3.21376e+06	8.38462e+06	2.99025e+06	2.86485e+06	1.07047e+07	9.58678e+06
M161T123	D-Galactose	161.043	123.5	180.063	10.6183	C6H12O6	[M-H2O-H]-			C00124	Carbohydrate metabolism; Digestive system	59-23-4 10257-28-0 / 10257-28-0 / 59-23-4		BioDeepDB	2	neg	1.43276e+07	6.30427e+06	2.52688e+07	4.84573e+06	1.66904e+07	3.46313e+07	5.85146e+06	5.89772e+06
M180T155	L-Tyrosine	180.066	154.6	181.074	1.79934	C9H11NO3	[M-H]-	Carboxylic acids and derivatives	Amino acids, peptides, and analogues	C00082	Cancer: overview; Metabolism of cofactors and vitamins; Nervous system; Digestive system; Endocrine system; Neurodegenerative disease; Translation; Amino acid metabolism; Substance dependence	60-18-4	HMDB0000158	BioDeepDB	2	neg	7.53825e+08	1.21882e+09	4.65658e+08	5.59676e+08	2.00011e+09	1.37568e+09	1.52073e+09	7.12857e+08
M163T392	Phenylpyruvic acid	163.04	392.1	164.047	1.3739	C9H8O3	[M-H]-	Benzene and substituted derivatives	Phenylpyruvic acid derivatives	C00166	Amino acid metabolism	156-06-9	HMDB0000205	BioDeepDB	2	neg	2.81198e+06	1.45844e+06	6.10956e+06	1.34365e+06	1.55029e+06	2.64118e+06	946040	3.51289e+06
M164T772	D-Phenylalanine	164.069	772.1	165.079	8.45675	C9H11NO2	[M-H]-			C02265	Amino acid metabolism; Sensory system	673-06-3		BioDeepDB	2	neg	3.8984e+07	1.35684e+07	7.50814e+06	1.92534e+07	1.13976e+07	1.12002e+07	1.13186e+07	1.16594e+07
M167T99	Uric acid	167.021	99	168.028	0.143695	C5H4N4O3	[M-H]-	Imidazopyrimidines	Purines and purine derivatives	C00366	Digestive system; Nucleotide metabolism	69-93-2	HMDB0000289	BioDeepDB	2	neg	8.08332e+07	1.29901e+08	4.71382e+07	8.21258e+07	1.42003e+08	3.93028e+07	9.82877e+07	1.22821e+08
M169T102	Pyridoxine	169.007	102.3	169.074	14.7597	C8H11NO3	[M]-	Pyridines and derivatives	Pyridoxines	C00314	Metabolism of cofactors and vitamins	65-23-6	HMDB0000239	BioDeepDB	2	neg	1.54127e+07	2.99312e+07	1.35388e+07	1.26002e+07	2.46079e+06	1.70756e+06	3.34255e+06	5.31887e+06
M187T266	Azelaic acid	187.097	266	188.105	0.662756	C9H16O4	[M-H]-	Fatty Acyls	Fatty acids and conjugates	C08261		123-99-9	HMDB0000784	BioDeepDB	2	neg	4.86958e+06	4.5505e+06	3.47998e+06	5.58279e+06	3.55614e+06	2.7042e+06	4.74644e+06	3.70087e+06
M173T94	L-Arginine	173.104	94.5	174.112	0.716331	C6H14N4O2	[M-H]-	Carboxylic acids and derivatives	Amino acids, peptides, and analogues	C00062	Cancer: overview; Membrane transport; Signal transduction; Digestive system; Neurodegenerative disease; Translation; Amino acid metabolism; Infectious disease: parasitic	74-79-3	HMDB0000517	BioDeepDB	2	neg	1.25851e+08	3.69885e+08	9.45597e+07	9.54601e+07	1.50111e+08	7.15758e+07	8.26018e+07	1.81757e+08
M173T445	4-Quinolinecarboxylic acid	173.118	445.4	173.048	6.91994	C10H7NO2	[M]-			C06414		486-74-8		BioDeepDB	2	neg	2.68065e+06	2.09438e+06	2.52264e+06	2.86024e+06	2.55853e+06	2.56354e+06	3.12777e+06	2.30108e+06
M175T401	Guanidinosuccinic acid	174.953	401.5	175.059	9.64949	C5H9N3O4	[M]-	Carboxylic acids and derivatives	Amino acids, peptides, and analogues	C03139		6133-30-8	HMDB0003157	BioDeepDB	2	neg	1.48001e+07	1.64111e+07	8.81655e+06	1.02287e+07	1.83775e+07	2.78812e+07	1.38307e+07	1.50246e+07
M192T368	Phenylacetylglycine	192.066	368.5	193.074	0.64561	C10H11NO3	[M-H]-	Carboxylic acids and derivatives	Amino acids, peptides, and analogues	C05598	Amino acid metabolism	500-98-1	HMDB0000821	BioDeepDB	2	neg	4.67932e+08	2.76632e+08	5.12396e+08	7.26835e+08	6.37779e+08	6.9507e+08	6.20996e+08	6.25634e+08
M176T185	N-Formyl-L-methionine	176.038	184.8	177.046	1.27245	C6H11NO3S	[M-H]-	Carboxylic acids and derivatives	Amino acids, peptides, and analogues	C03145	Amino acid metabolism	4289-98-9	HMDB0001015	BioDeepDB	2	neg	353399	2.38338e+06	323090	324833	3.05951e+06	547519	2.4054e+06	1.33071e+06
M195T79	Gluconic acid	195.05	78.7	196.058	0.290787	C6H12O7	[M-H]-	Organooxygen compounds	Carbohydrates and carbohydrate conjugates	C00257	Carbohydrate metabolism	526-95-4	HMDB0000625	BioDeepDB	2	neg	3.6668e+08	9.10896e+08	4.7765e+08	6.29989e+08	5.15952e+08	4.8504e+08	2.91579e+08	4.72899e+08
M180T106	Caffeate	180.033	105.5	180.042	21.8666	C9H8O4	[M]-			C01197		501-16-6 / 331-39-5		BioDeepDB	2	neg	2.4875e+06	6.12349e+07	1.17714e+07	6.13269e+06	7.52447e+06	3.94471e+06	1.68939e+06	4.50166e+06
M179T402	D-Fructose	179.058	401.7	180.063	8.80163	C6H12O6	[M-H]-			C00095	Endocrine and metabolic disease; Membrane transport; Sensory system; Digestive system; Carbohydrate metabolism	57-48-7		BioDeepDB	2	neg	2.83133e+06	8.31008e+06	2.99096e+06	6.60941e+06	1.21294e+07	3.18322e+06	1.84991e+07	3.06971e+06
M180T773	L-Sorbose	179.989	773.4	180.063	5.29371	C6H12O6	[M]-			C00247	Carbohydrate metabolism	87-79-6		BioDeepDB	2	neg	1.25484e+07	9.57881e+06	1.0555e+07	133720	9.56896e+06	1.02303e+07	1.40447e+07	1.19678e+07
M163T105	Sorbitol	163.061	105.4	182.079	2.39174	C6H14O6	[M-H2O-H]-	Organooxygen compounds	Carbohydrates and carbohydrate conjugates	C00794	Carbohydrate metabolism; Membrane transport	50-70-4	HMDB0000247	BioDeepDB	2	neg	7.38821e+06	1.35071e+07	4.43967e+06	4.86366e+06	5.2113e+06	2.9729e+06	3.97444e+06	8.94551e+06
M181T96_3	Mannitol	181.072	95.7	182.079	0.684812	C6H14O6	[M-H]-	Organooxygen compounds	Carbohydrates and carbohydrate conjugates	C00392	Carbohydrate metabolism; Membrane transport	69-65-8	HMDB0000765	BioDeepDB	2	neg	6.64398e+07	1.42004e+07	1.04808e+08	8.00677e+07	9.26398e+07	1.64907e+08	2.93996e+07	1.0732e+08
M204T323	Xanthurenic acid	204.03	322.7	205.037	0.11763	C10H7NO4	[M-H]-	Quinolines and derivatives	Quinoline carboxylic acids	C02470	Amino acid metabolism	59-00-7	HMDB0000881	BioDeepDB	2	neg	2.19118e+06	2.14716e+06	2.05967e+06	2.47202e+06	1.97966e+06	1.64868e+06	2.44692e+06	1.69487e+06
M194T801	Methyl beta-D-galactoside	194.082	801.1	194.079	1.51127	C7H14O6	[M]-			C03619	Membrane transport	1824-94-8		BioDeepDB	2	neg	4.90862e+07	4.61404e+07	5.07037e+07	4.51224e+07	5.4777e+07	4.91515e+07	5.13301e+07	4.89272e+07
M203T357	L-Tryptophan	203.082	357.4	204.09	1.07448	C11H12N2O2	[M-H]-	Indoles and derivatives	Indolyl carboxylic acids and derivatives	C00078	Cancer: overview; Nervous system; Digestive system; Translation; Amino acid metabolism; Infectious disease: parasitic	73-22-3	HMDB0000929	BioDeepDB	2	neg	6.89259e+08	4.22994e+08	1.35385e+09	9.701e+08	1.03298e+09	1.31447e+09	4.00202e+08	3.53655e+08
M220T95	N-Acetylmannosamine	220.082	95	221.09	1.0178	C8H15NO6	[M-H]-	Organooxygen compounds	Carbohydrates and carbohydrate conjugates	C00645	Carbohydrate metabolism	7772-94-3 / 3615-17-6	HMDB0001129	BioDeepDB	2	neg	2.44244e+07	3.66017e+08	9.5424e+07	6.28965e+07	2.04992e+07	2.71826e+07	3.03081e+06	6.86228e+06
M223T753	Thymidine	223.028	752.9	242.09	1.37927	C10H14N2O5	[M-H2O-H]-	Pyrimidine nucleosides	Pyrimidine 2'-deoxyribonucleosides	C00214	Nucleotide metabolism	50-89-5	HMDB0000273	BioDeepDB	2	neg	287294	1.14637e+06	609375	333521	152191	129390	130412	167549
M241T764	Equol	241.181	764.4	242.094	11.4921	C15H14O3	[M-H]-	Isoflavonoids	Isoflavans	C14131		531-95-3	HMDB0002209	BioDeepDB	2	neg	2.35778e+07	1.46709e+08	5.91205e+07	4.09951e+07	5.32619e+07	6.53709e+07	1.88296e+07	9.07489e+07
M255T749	Palmitic acid	255.074	749	256.24	6.26111	C16H32O2	[M-H]-	Fatty Acyls	Fatty acids and conjugates	C00249	Lipid metabolism	57-10-3	HMDB0000220	BioDeepDB	2	neg	866613	711733	1.34404e+06	110665	2.30194e+06	4.9793e+06	3.31044e+06	2.0191e+06
M265T767	Stearic acid	265.147	767.2	284.272	3.58285	C18H36O2	[M-H2O-H]-	Fatty Acyls	Fatty acids and conjugates	C01530	Lipid metabolism	57-11-4 / 646-29-7	HMDB0000827	BioDeepDB	2	neg	1.92953e+08	9.57653e+07	2.1e+08	2.61184e+08	1.91598e+08	1.74328e+08	2.17171e+08	1.42986e+08
M267T786	Formononetin	267.196	785.8	268.074	15.3844	C16H12O4	[M-H]-	Isoflavonoids	O-methylated isoflavonoids	C00858		485-72-3	HMDB0005808	BioDeepDB	2	neg	1.60057e+07	2.82822e+07	1.29748e+07	1.52482e+07	8.73881e+06	2.74441e+07	2.71763e+07	6.53049e+06
M285T337	Luteolin	285.17	336.6	286.048	3.90102	C15H10O6	[M-H]-	Flavonoids	Flavones	C01514		491-70-3	HMDB0005800	BioDeepDB	2	neg	46734.4	2886.48	58539.7	50893.2	61819.1	62191.5	65322.2	98026.1
M269T692	Apigenin	269.045	692.2	270.053	2.98182	C15H10O5	[M-H]-	Flavonoids	Flavones	C01477		520-36-5	HMDB0002124	BioDeepDB	2	neg	6.70501e+06	8.40506e+07	3.41546e+07	1.1081e+07	6.78588e+06	1.06945e+06	2.41262e+06	9.8329e+06
M271T834	17a-Estradiol	271.227	833.5	272.178	2.48855	C18H24O2	[M-H]-	Steroids and steroid derivatives	Estrane steroids	C02537	Lipid metabolism	57-91-0	HMDB0000429	BioDeepDB	2	neg	1.19339e+07	4.33795e+06	1.1889e+07	1.23912e+07	8.39187e+06	1.1961e+07	1.32801e+07	1.71153e+07
M279T812	Linoleic acid	279.232	812	280.24	2.59282	C18H32O2	[M-H]-	Fatty Acyls	Lineolic acids and derivatives	C01595	Lipid metabolism	60-33-3	HMDB0000673	BioDeepDB	2	neg	1.99126e+09	7.93546e+08	1.9629e+09	1.956e+09	1.34825e+09	2.10636e+09	2.66499e+09	1.39338e+09
M299T796	all-trans-Retinoic acid	299.259	796.4	300.209	1.06791	C20H28O2	[M-H]-	Prenol lipids	Retinoids	C00777	Cancer: overview; Immune system; Metabolism of cofactors and vitamins; Cancer: specific types	302-79-4	HMDB0001852	BioDeepDB	2	neg	6.08272e+06	1.38436e+07	7.20541e+06	6.17779e+06	1.48265e+07	1.08185e+07	1.50548e+07	6.59552e+06
M287T570	(-)-Epigallocatechin	287.055	569.8	306.074	0.383201	C15H14O7	[M-H2O-H]-	Flavonoids	Flavans	C12136		970-74-1	HMDB0038361	MoNA	2	neg	4.23628e+07	1.53773e+08	8.73597e+07	6.19689e+07	5.75181e+07	5.03252e+07	7.997e+06	3.70594e+07
M309T791	Ribose 1,5-bisphosphate	309.173	791	309.986	4.63592	C5H12O11P2	[M-H]-	Organooxygen compounds	Carbohydrates and carbohydrate conjugates	C01151	Carbohydrate metabolism; Metabolism of other amino acids	14689-84-0	HMDB0011688	BioDeepDB	2	neg	1.50628e+07	1.08258e+07	1.99831e+07	2.25993e+07	2.95302e+07	2.74673e+07	2.5001e+07	2.16368e+07
M311T790	Arachidic acid	311.168	789.6	312.303	2.87947	C20H40O2	[M-H]-	Fatty Acyls	Fatty acids and conjugates	C06425	Lipid metabolism	506-30-9	HMDB0002212	BioDeepDB	2	neg	5.1586e+07	1.03443e+07	6.01463e+07	6.14164e+07	3.96465e+07	4.40626e+07	5.08319e+07	6.13217e+07
M323T118	Melibiose	323.097	118.3	342.116	2.19748	C12H22O11	[M-H2O-H]-	Organooxygen compounds	Carbohydrates and carbohydrate conjugates	C05400	Carbohydrate metabolism	585-99-9 / 17296-19-4	HMDB0000048	BioDeepDB	2	neg	75979.4	4.01595e+06	379669	395028	950105	666728	243783	419024
M347T101	IMP	347.038	100.6	348.047	5.1367	C10H13N4O8P	[M-H]-	Purine nucleotides	Purine ribonucleotides	C00130	Sensory system; Nucleotide metabolism	131-99-7	HMDB0000175	BioDeepDB	2	neg	2.74779e+06	9.36582e+07	1.53762e+06	2.52878e+06	2.2283e+07	1.25042e+07	4.22833e+06	1.31304e+07
M334T571	Nicotinamide ribotide	333.939	570.7	334.057	2.88762	C11H15N2O8P	[M]-	Pyridine nucleotides	Nicotinamide nucleotides	C00455	Metabolism of cofactors and vitamins	1094-61-7	HMDB0000229	BioDeepDB	2	neg	3.06274e+06	740875	1.12556e+06	2.14076e+06	2.57434e+06	883793	3.2904e+06	2.13386e+06
M339T824	Fructose 1,6-bisphosphate	339.198	824.1	339.996	3.94406	C6H14O12P2	[M-H]-	Organooxygen compounds	Carbohydrates and carbohydrate conjugates	C00354	Cancer: overview; Amino acid metabolism; Signal transduction; Endocrine system	488-69-7	HMDB0001058	BioDeepDB	2	neg	7.63075e+07	6.05248e+07	1.09606e+08	1.21006e+08	5.21466e+07	5.3605e+07	7.49768e+07	4.13524e+07
M341T98	Cellobiose	341.108	97.7	342.116	0.559788	C12H22O11	[M-H]-			C00185	Carbohydrate metabolism; Membrane transport	16462-44-5 / 528-50-7		BioDeepDB	2	neg	7.6967e+06	1.15138e+07	7.58407e+06	7.5317e+06	6.91982e+06	4.9072e+06	3.38517e+06	7.01166e+06
M375T440_1	Riboflavin	375.128	439.9	376.138	8.08604	C17H20N4O6	[M-H]-	Pteridines and derivatives	Alloxazines and isoalloxazines	C00255	Metabolism of cofactors and vitamins; Digestive system; Membrane transport	83-88-5	HMDB0000244	BioDeepDB	2	neg	1.64758e+07	3.75529e+06	1.57556e+07	3.77268e+06	1.20902e+07	1.30913e+07	1.34721e+07	1.30114e+07
M391T793	Chenodeoxycholic acid	391.284	793.1	392.293	0.494041	C24H40O4	[M-H]-	Steroids and steroid derivatives	Bile acids, alcohols and derivatives	C02528	Lipid metabolism; Digestive system	474-25-9	HMDB0000518	BioDeepDB	2	neg	8.0587e+06	2.5852e+07	7.66446e+06	4.03831e+06	5.16614e+06	1.55011e+07	2.28208e+06	5.33294e+07
M401T544_1	25-Hydroxycholesterol	401.084	544.3	402.35	7.57577	C27H46O2	[M-H]-	Steroids and steroid derivatives	Cholestane steroids	C15519	Lipid metabolism	2140-46-7	HMDB0006247	BioDeepDB	2	neg	2.60252e+07	3.69207e+07	1.93731e+07	7.254e+06	2.27334e+07	1.74092e+06	302033	5.48629e+06
M408T706_1	Allocholic acid	408.2	706.2	408.288	5.94518	C24H40O5	[M]-	Steroids and steroid derivatives	Bile acids, alcohols and derivatives	C00695	Lipid metabolism; Digestive system	2464-18-8 / 81-25-4	HMDB0000505	BioDeepDB	2	neg	7.78717e+06	2.28069e+06	6.42838e+06	7.39359e+06	1.04473e+06	520142	2.68554e+06	6.77458e+06
M464T607	Glycocholic acid	464.3	607.4	465.309	2.81512	C26H43NO6	[M-H]-			C01921	Lipid metabolism; Digestive system	1192657-83-2		BioDeepDB	2	neg	152994	164005	216882	76246.4	221395	65354.8	90790	72312.1
M665T104	Stachyose	665.218	103.5	666.222	5.67633	C24H42O21	[M-H]-			C01613	Carbohydrate metabolism	54261-98-2	HMDB0003553	BioDeepDB	2	neg	6.42436e+06	7.96984e+06	5.32098e+06	4.52017e+06	6.67958e+06	4.92578e+06	1.52745e+07	1.32736e+07
M101T219	2-Ketobutyric acid	101.024	218.6	102.032	7.91894	C4H6O3	[M-H]-	Keto acids and derivatives	Short-chain keto acids and derivatives	C00109	Carbohydrate metabolism; Amino acid metabolism	600-18-0	HMDB0000005	BioDeepDB	2	neg	5.66141e+07	2.71567e+07	8.48152e+06	5.88456e+07	3.67404e+07	2.16786e+07	7.59727e+06	2.04516e+07
M109T358	Hydroquinone	109.029	357.6	110.037	0	C6H6O2	[M-H]-	Phenols	Benzenediols	C00530	Amino acid metabolism	123-31-9	HMDB0002434	BioDeepDB	2	neg	5.4812e+06	4.3564e+06	4.05498e+06	4.59768e+06	5.14311e+06	3.48189e+06	5.34244e+06	4.56458e+06
M111T142	Uracil	111.021	141.9	112.027	6.98968	C4H4N2O2	[M-H]-	Diazines	Pyrimidines and pyrimidine derivatives	C00106	Metabolism of cofactors and vitamins; Metabolism of other amino acids; Nucleotide metabolism	66-22-8	HMDB0000300	BioDeepDB	2	neg	4.75188e+08	5.41835e+08	2.27454e+07	2.12747e+08	4.82831e+08	7.97456e+07	9.60854e+07	3.88833e+08
M117T141	Guanidinoacetate	117.055	140.6	117.054	13.4425	C3H7N3O2	[M]-	Carboxylic acids and derivatives	Amino acids, peptides, and analogues	C00581	Amino acid metabolism	352-97-6	HMDB0000128	mzCloud	2	neg	9.08563e+06	6.66138e+06	2.95084e+06	2.35877e+06	1.53124e+07	1.98586e+07	8.03855e+06	1.34346e+07
M119T404	L-Erythrulose	119.035	404.3	120.042	1.47855	C4H8O4	[M-H]-	Organooxygen compounds	Carbohydrates and carbohydrate conjugates	C02045		533-50-6/496-55-9	HMDB0006293	BioDeepDB	2	neg	4.44147e+06	2.64674e+06	4.58724e+06	3.96468e+06	1.09219e+07	1.47396e+06	4.38997e+06	9.8487e+06
M127T121	Adipic acid	127.04	120.8	146.058	3.0699	C6H10O4	[M-H2O-H]-	Fatty Acyls	Fatty acids and conjugates	C06104		124-04-9	HMDB0000448	BioDeepDB	2	neg	7.01688e+06	2.60061e+07	4.14608e+06	1.46876e+06	5.87479e+06	2.04569e+06	3.85851e+06	5.1202e+06
M130T429	Beta-Leucine	130.085	429.3	131.095	14.0215	C6H13NO2	[M-H]-	Carboxylic acids and derivatives	Amino acids, peptides, and analogues	C02486		5699-54-7	HMDB0003640	BioDeepDB	2	neg	1.30451e+07	1.24853e+07	1.3167e+07	3.53033e+06	3.22564e+06	2.95591e+06	2.60831e+06	5.97746e+06
M131T95_1	L-Ribulose	131.034	95.2	150.053	5.41845	C5H10O5	[M-H2O-H]-	Organooxygen compounds	Carbohydrates and carbohydrate conjugates	C00310	Carbohydrate metabolism	2042-27-5/551-84-8	HMDB0003371	BioDeepDB	2	neg	2.79479e+07	3.29957e+07	6.10699e+07	3.8569e+07	6.29303e+07	3.16804e+07	3.19544e+07	3.11852e+07
M151T357	3-Hydroxyphenylacetic acid	151.04	356.6	152.047	1.48305	C8H8O3	[M-H]-	Phenols	1-hydroxy-4-unsubstituted benzenoids	C05593	Amino acid metabolism	621-37-4	HMDB0000440	BioDeepDB	2	neg	8.00626e+06	2.06403e+07	1.00316e+07	1.03871e+07	7.29043e+06	3.48528e+06	5.04077e+06	2.08801e+06
M133T97	Ribitol	133.05	96.6	152.069	2.17963	C5H12O5	[M-H2O-H]-	Organooxygen compounds	Carbohydrates and carbohydrate conjugates	C00474	Carbohydrate metabolism; Metabolism of cofactors and vitamins	488-81-3	HMDB0000508	BioDeepDB	2	neg	9.61412e+06	5.59117e+07	2.11731e+07	1.73791e+07	2.13421e+07	3.55809e+07	2.37728e+07	7.59876e+07
M135T122	Hypoxanthine	135.03	121.9	136.038	9.6275	C5H4N4O	[M-H]-	Imidazopyrimidines	Purines and purine derivatives	C00262	Nucleotide metabolism	68-94-0	HMDB0000157	BioDeepDB	2	neg	8.47492e+08	1.55438e+09	1.27156e+09	4.51121e+08	3.00462e+08	4.18198e+08	1.2513e+09	9.33352e+08
M138T603	6-Hydroxynicotinic acid	138.019	603	139.027	0.898424	C6H5NO3	[M-H]-	Pyridines and derivatives	Pyridinecarboxylic acids and derivatives	C01020	Metabolism of cofactors and vitamins	5006-66-6	HMDB0002658	BioDeepDB	2	neg	4.78434e+07	1.23743e+07	1.29212e+07	1.31076e+07	9.45325e+06	5.73923e+06	3.58454e+07	3.79052e+07
M151T161	Xanthine	151.026	161.4	152.033	1.98642	C5H4N4O2	[M-H]-	Imidazopyrimidines	Purines and purine derivatives	C00385	Biosynthesis of other secondary metabolites; Nucleotide metabolism	69-89-6	HMDB0000292	BioDeepDB	2	neg	1.09789e+09	1.15979e+09	9.56824e+08	1.05825e+09	9.47645e+08	7.47938e+08	1.08561e+09	9.08916e+08
M151T515	Vanillin	151.04	514.9	152.047	0.158898	C8H8O3	[M-H]-	Phenols	Methoxyphenols	C00755		121-33-5	HMDB0012308	BioDeepDB	2	neg	3.80821e+06	1.57657e+06	3.15942e+06	1.63305e+06	2.1367e+06	2.05337e+06	584634	3.57728e+06
M157T101	Allantoin	157.037	101.5	158.044	0	C4H6N4O3	[M-H]-	Azoles	Imidazoles	C01551		97-59-6	HMDB0000462	BioDeepDB	2	neg	2.1251e+07	2.29455e+07	1.89073e+07	3.17185e+07	1.45058e+07	2.67649e+06	1.45009e+07	888185
M179T311	L-Gulose	179.054	310.5	180.063	13.9623	C6H12O6	[M-H]-	Organooxygen compounds	Carbohydrates and carbohydrate conjugates	C15923	Carbohydrate metabolism	6027-89-0	HMDB0012326	BioDeepDB	2	neg	4.31134e+06	2.37085e+07	4.27484e+06	1.46332e+07	4.8053e+06	4.50328e+06	1.16359e+06	1.3998e+07
M179T300	Alpha-D-Glucose	179.058	300.3	180.063	9.91858	C6H12O6	[M-H]-	Organooxygen compounds	Carbohydrates and carbohydrate conjugates	C00267	Carbohydrate metabolism; Excretory system	492-62-6	HMDB0003345	BioDeepDB	2	neg	6.86616e+06	9.32755e+06	8.17936e+06	7.34495e+06	7.77997e+06	6.09751e+06	7.92681e+06	7.48152e+06
M182T335	4-Pyridoxic acid	182.046	334.8	183.053	1.64794	C8H9NO4	[M-H]-	Pyridines and derivatives	Pyridinecarboxylic acids and derivatives	C00847	Metabolism of cofactors and vitamins	82-82-6	HMDB0000017	BioDeepDB	2	neg	5.33802e+07	5.77062e+07	5.14138e+07	5.59463e+07	5.44656e+07	5.50132e+07	5.64034e+07	6.06988e+07
M169T121	Gallic acid	169.017	121.4	170.022	17.6077	C7H6O5	[M-H]-	Benzene and substituted derivatives	Benzoic acids and derivatives	C01424		149-91-7	HMDB0005807	BioDeepDB	2	neg	2.18597e+06	3.70302e+06	2.14234e+06	2.27948e+06	2.01549e+06	2.45475e+06	3.76173e+06	4.09329e+06
M173T73	Citric acid	173.009	72.8	192.027	2.83222	C6H8O7	[M-H2O-H]-	Carboxylic acids and derivatives	Tricarboxylic acids and derivatives	C00158	Cancer: overview; Sensory system; Endocrine system; Carbohydrate metabolism; Amino acid metabolism	77-92-9/126-44-3	HMDB0000094	BioDeepDB	2	neg	5.25163e+07	1.67555e+07	1.43623e+07	1.07371e+07	1.38116e+07	3.24447e+07	3.02112e+07	2.45997e+07
M173T101	N-Acetylornithine	173.093	100.7	174.1	1.87183	C7H14N2O3	[M-H]-	Carboxylic acids and derivatives	Amino acids, peptides, and analogues	C00437	Amino acid metabolism	6205-08-9/2185-16-2	HMDB0003357	BioDeepDB	2	neg	1.42748e+07	1.3695e+07	7.68503e+06	1.69598e+07	1.56918e+07	1.95985e+07	2.00042e+07	1.58057e+07
M175T341	D-Glucuronic acid	175.025	341	194.043	1.65691	C6H10O7	[M-H2O-H]-	Organooxygen compounds	Carbohydrates and carbohydrate conjugates	C00191	Carbohydrate metabolism	6556-12-3/528-16-5	HMDB0000127	BioDeepDB	2	neg	9.80124e+06	4.07901e+07	5.83449e+06	1.96199e+07	3.86011e+07	4.02219e+07	1.72396e+06	2.36645e+07
M176T112	2-Isopropylmalic acid	176.064	111.7	176.069	24.4229	C7H12O5	[M]-	Fatty Acyls	Fatty acids and conjugates	C02504	Carbohydrate metabolism; Amino acid metabolism	3237-44-3	HMDB0000402	BioDeepDB	2	neg	1.62057e+06	9.58128e+06	960066	3.92148e+06	4.08461e+06	3.78606e+06	5.17364e+06	2.58355e+06
M201T401	Sebacic acid	201.113	401.3	202.12	0.377896	C10H18O4	[M-H]-	Fatty Acyls	Fatty acids and conjugates	C08277		111-20-6	HMDB0000792	BioDeepDB	2	neg	7.9012e+06	5.26939e+06	3.97166e+06	4.66128e+06	3.61407e+06	4.17976e+06	4.80835e+06	2.58816e+06
M204T379	Indolelactic acid	204.067	379	205.074	2.33257	C11H11NO3	[M-H]-	Indoles and derivatives	Indolyl carboxylic acids and derivatives	C02043		1821-52-9	HMDB0000671	BioDeepDB	2	neg	615324	542379	389504	167193	667754	370230	821589	605166
M188T121_3	Miglitol	188.092	121.4	207.111	0.478488	C8H17NO5	[M-H2O-H]-	Piperidines		C07708		72432-03-2	HMDB0014634	BioDeepDB	2	neg	3.97237e+07	6.54451e+06	2.8983e+07	1.43811e+07	1.25416e+06	3.63038e+07	6.12848e+07	3.99272e+07
M209T88	Sedoheptulose	209.066	87.9	210.074	1.43495	C7H14O7	[M-H]-	Organooxygen compounds	Carbohydrates and carbohydrate conjugates	C02076		3019-74-7	HMDB0003219	BioDeepDB	2	neg	3.39581e+07	9.04333e+07	3.91279e+07	4.80023e+07	4.54333e+07	4.39866e+07	4.27004e+07	4.79981e+07
M210T325	Phosphocreatine	210.026	325.4	211.036	11.9033	C4H10N3O5P	[M-H]-	Carboxylic acids and derivatives	Amino acids, peptides, and analogues	C02305	Amino acid metabolism	67-07-2	HMDB0001511	BioDeepDB	2	neg	1.57202e+06	8.32201e+06	1.53584e+06	1.65018e+06	1.63704e+06	1.79657e+06	2.85102e+06	1.48578e+06
M229T373	Dodecanedioic acid	229.144	373.1	230.152	1.41396	C12H22O4	[M-H]-	Fatty Acyls	Fatty acids and conjugates	C02678		693-23-2	HMDB0000623	mzCloud	2	neg	1.71036e+06	2.009e+06	2.47261e+06	2.66225e+06	1.80533e+06	1.49515e+06	2.19748e+06	1.4306e+06
M229T76	Ribose 1-phosphate	229.011	75.8	230.019	2.1833	C5H11O8P	[M-H]-	Organooxygen compounds	Carbohydrates and carbohydrate conjugates	C00620	Carbohydrate metabolism; Nucleotide metabolism	14075-00-4	HMDB0001489	BioDeepDB	2	neg	2.1574e+07	3.81191e+07	2.26815e+07	2.28959e+07	2.00519e+07	1.31391e+07	7.18711e+07	1.84458e+07
M254T605	Daidzein	254.054	605.5	254.058	17.3192	C15H10O4	[M]-	Isoflavonoids	Isoflav-2-enes	C10208		486-66-8	HMDB0003312	BioDeepDB	2	neg	978027	5.24362e+07	9.12901e+06	4.85031e+06	3.75289e+06	2.93447e+06	1.01848e+06	1.65346e+06
M283T122	Xanthosine	283.068	121.5	284.076	2.20442	C10H12N4O6	[M-H]-	Purine nucleosides		C01762	Membrane transport; Biosynthesis of other secondary metabolites; Nucleotide metabolism	146-80-5	HMDB0000299	mzCloud	2	neg	4.51713e+07	8.38434e+06	9.16629e+07	9.55651e+07	3.28138e+07	2.77774e+07	8.01308e+07	1.33435e+07
M291T422	2-hydroxyflutamide	291.053	422.3	292.067	22.3327	C11H11F3N2O4	[M-H]-	Benzene and substituted derivatives	Trifluoromethylbenzenes	C14204		52806-53-8	HMDB0060949	BioDeepDB	2	neg	188814	1.40101e+07	1.96327e+06	1.46658e+06	2.7684e+06	4.98522e+06	878258	5.23466e+06
M275T71_2	6-Phosphogluconic acid	275.021	71.5	276.025	11.2719	C6H13O10P	[M-H]-	Organooxygen compounds	Carbohydrates and carbohydrate conjugates	C00345	Carbohydrate metabolism	921-62-0/53411-70-4	HMDB0001316	BioDeepDB	2	neg	425561	5.04875e+08	8.59574e+07	2.02593e+07	2.93336e+07	2.53838e+07	1.04024e+07	4.64149e+07
M293T839	13-L-Hydroperoxylinoleic acid	293.211	839.3	312.23	1.73936	C18H32O4	[M-H2O-H]-	Fatty Acyls	Lineolic acids and derivatives	C04717	Lipid metabolism	33964-75-9	HMDB0003871	BioDeepDB	2	neg	5.0452e+06	1.02312e+07	4.30238e+06	4.74389e+06	6.44075e+06	1.84544e+06	5.50404e+06	5.7035e+06
M311T777	9(S)-HPODE	311.224	776.6	312.23	4.09994	C18H32O4	[M-H]-	Fatty Acyls	Lineolic acids and derivatives	C14827	Lipid metabolism	29774-12-7	HMDB0006940	BioDeepDB	2	neg	6.31685e+06	7.76358e+06	5.47825e+06	6.42636e+06	5.18691e+06	5.72418e+06	7.24189e+06	8.22164e+06
M295T828	9,10-Epoxyoctadecenoic acid	295.227	828.1	296.235	2.79107	C18H32O3	[M-H]-	Fatty Acyls	Fatty acids and conjugates	C14825	Lipid metabolism		HMDB0004701	BioDeepDB	2	neg	1.72962e+08	1.54239e+09	1.38713e+09	2.26038e+07	1.76614e+08	3.8242e+08	1.33344e+08	3.1923e+08
M319T836	16(R)-HETE	319.227	835.9	320.235	3.83427	C20H32O3	[M-H]-	Fatty Acyls	Eicosanoids	C14778	Lipid metabolism	183509-22-0	HMDB0004680	BioDeepDB	2	neg	4.15553e+08	5.30257e+08	2.09532e+08	3.81439e+07	2.64782e+08	3.00836e+08	1.38604e+08	4.21497e+08
M303T835	Arachidonic acid	303.231	835.5	304.24	6.67478	C20H32O2	[M-H]-	Fatty Acyls	Fatty acids and conjugates	C00219	Circulatory system; Cell growth and death; Nervous system; Sensory system; Endocrine system; Lipid metabolism; Immune system; Infectious disease: parasitic	506-32-1	HMDB0001043	BioDeepDB	2	neg	2.01955e+07	6.64016e+06	4.94537e+06	3.2334e+06	1.69679e+06	2.39354e+07	1.10892e+06	5.24129e+06
M313T767	9,10-DHOME	313.237	766.7	314.246	4.78871	C18H34O4	[M-H]-	Fatty Acyls	Fatty acids and conjugates	C14828	Lipid metabolism	263399-34-4	HMDB0004704	BioDeepDB	2	neg	2.13948e+07	7.29737e+07	1.43458e+07	2.13803e+07	9.2101e+06	1.50724e+07	6.28619e+06	9.99188e+06
M317T815	5-KETE	317.212	814.6	318.219	1.26099	C20H30O3	[M-H]-	Fatty Acyls	Fatty acids and conjugates	C14732	Lipid metabolism	126432-17-5/106154-18-1	HMDB0010217	BioDeepDB	2	neg	2.6807e+08	2.91003e+08	2.48061e+08	2.59518e+08	1.83018e+08	1.5934e+08	2.88211e+08	1.7136e+08
M320T186	Topiramate	320.084	185.6	339.099	9.65373	C12H21NO8S	[M-H2O-H]-	Dioxolopyrans		C07502		97240-79-4	HMDB0005034	MoNA	2	neg	7.8777e+06	5.98796e+06	8.64041e+06	1.10864e+07	1.55075e+06	6.25718e+06	6.32321e+06	1.08835e+07
M325T806	11-Dehydrocorticosterone	325.183	806.3	344.199	7.96475	C21H28O4	[M-H2O-H]-	Steroids and steroid derivatives	Hydroxysteroids	C05490	Lipid metabolism	72-23-1	HMDB0004029	BioDeepDB	2	neg	9.22069e+07	1.67645e+07	8.25528e+07	2.65639e+07	5.44919e+07	8.89158e+07	9.42268e+07	1.48668e+07
M329T591	Carnosol	329.176	590.9	330.183	0.607578	C20H26O4	[M-H]-	Prenol lipids	Terpene lactones	C09069		5957-80-2	HMDB0002121	BioDeepDB	2	neg	1.94591e+06	1.60827e+06	2.47445e+06	2.0483e+06	1.73897e+06	1.95102e+06	2.48667e+06	1.81216e+06
M329T736	Docosapentaenoic acid (22n-3)	329.247	736.2	330.256	4.55585	C22H34O2	[M-H]-	Fatty Acyls	Fatty acids and conjugates	C16513	Lipid metabolism	24880-45-3	HMDB0006528	BioDeepDB	2	neg	1.15795e+07	1.31595e+07	1.27091e+07	1.15675e+07	1.37834e+07	1.1462e+07	1.04868e+07	1.19771e+07
M333T712	Prostaglandin B2	333.206	712.5	334.214	2.1008	C20H30O4	[M-H]-	Fatty Acyls	Eicosanoids	C05954	Lipid metabolism; Nervous system	13367-85-6	HMDB0004236	BioDeepDB	2	neg	9.95536e+06	4.52511e+06	5.10323e+07	1.02038e+07	1.95874e+06	7.07538e+06	1.28138e+07	1.29858e+07
M333T628	Prostaglandin A2	333.206	627.9	334.214	3.00115	C20H30O4	[M-H]-	Fatty Acyls	Eicosanoids	C05953	Lipid metabolism; Nervous system	13345-50-1	HMDB0002752	BioDeepDB	2	neg	390245	192735	1.02875e+06	178185	863612	953817	759949	604224
M337T777	5,6-DHET	337.238	776.9	338.246	0	C20H34O4	[M-H]-	Fatty Acyls	Eicosanoids	C14772	Lipid metabolism; Nervous system	213382-49-1	HMDB0002343	BioDeepDB	2	neg	5.21576e+06	5.29846e+06	4.71535e+06	616165	6.79125e+06	4.54138e+06	2.98392e+06	2.95364e+06
M346T121_1	3'-AMP	346.054	120.6	347.063	4.04561	C10H14N5O7P	[M-H]-	Ribonucleoside 3'-phosphates		C01367	Nucleotide metabolism	84-21-9	HMDB0003540	BioDeepDB	2	neg	1.13223e+08	6.14873e+07	2.64235e+08	3.78538e+08	9.41082e+07	1.1765e+08	2.8286e+08	3.4855e+07
M365T377	20-Carboxy-leukotriene B4	365.196	377.4	366.204	3.35163	C20H30O6	[M-H]-	Fatty Acyls	Fatty acids and conjugates	C05950	Lipid metabolism	80434-82-8	HMDB0006059	BioDeepDB	2	neg	1.90628e+06	3.16198e+06	1.73066e+06	1.59316e+06	1.86522e+06	840266	1.28241e+06	1.62367e+06
M351T628_1	Prostaglandin H2	351.216	628.1	352.225	4.84033	C20H32O5	[M-H]-	Fatty Acyls	Eicosanoids	C00427	Lipid metabolism; Immune system; Nervous system; Endocrine system	42935-17-1	HMDB0001381	BioDeepDB	2	neg	1.67441e+07	1.75247e+07	8.25612e+06	1.0356e+07	1.59764e+07	2.44959e+07	6.08326e+06	2.23263e+07
M351T747	Prostaglandin F3a	351.216	746.6	352.225	4.84033	C20H32O5	[M-H]-	Fatty Acyls	Eicosanoids	C06476		745-64-2	HMDB0002122	BioDeepDB	2	neg	5.46003e+06	3.89241e+06	5.92678e+06	6.12094e+06	4.82769e+06	5.20222e+06	7.11438e+06	7.69822e+06
M369T532_1	6-Keto-prostaglandin F1a	369.226	532	370.236	6.83593	C20H34O6	[M-H]-	Fatty Acyls	Eicosanoids	C05961	Lipid metabolism	58962-34-8	HMDB0002886	BioDeepDB	2	neg	3.287e+07	1.41144e+07	3.07324e+08	3.86932e+08	2.71313e+07	2.30064e+07	8.18674e+07	1.81935e+07
M351T440	Lipoxin A4	351.216	440.2	352.225	4.27087	C20H32O5	[M-H]-	Fatty Acyls	Eicosanoids	C06314	Lipid metabolism; Infectious disease: parasitic; Signaling molecules and interaction	89663-86-5	HMDB0004385	BioDeepDB	2	neg	912048	721856	2.39465e+06	3.96543e+06	3.56934e+06	3.22534e+06	635896	8.0194e+06
M353T642	Prostaglandin E1	353.232	641.9	354.241	3.6803	C20H34O5	[M-H]-	Fatty Acyls	Eicosanoids	C04741		745-65-3	HMDB0001442	BioDeepDB	2	neg	1.85707e+06	2.96999e+06	921763	961846	5.76831e+06	5.42274e+06	5.66875e+06	1.58004e+06
M355T834	Prostaglandin F1a	355.255	834	356.256	17.9477	C20H36O5	[M-H]-	Fatty Acyls	Eicosanoids	C06475		745-62-0	HMDB0002685	BioDeepDB	2	neg	2.45621e+06	9.00085e+06	7.78681e+06	2.10032e+06	1.74743e+06	5.1103e+06	8.16849e+06	523545
M362T99	GMP	362.049	98.9	363.058	4.14308	C10H14N5O8P	[M-H]-	Purine nucleotides	Purine ribonucleotides	C00144	Sensory system; Signal transduction; Nucleotide metabolism	85-32-5	HMDB0001397	BioDeepDB	2	neg	1.33494e+06	6.42039e+07	1.8273e+06	6.08245e+06	3.00755e+07	2.83195e+07	1.20035e+07	2.16929e+07
M369T586_1	Thromboxane B2	369.226	585.6	370.236	6.83593	C20H34O6	[M-H]-	Fatty Acyls	Eicosanoids	C05963	Lipid metabolism; Nervous system; Digestive system	54397-85-2	HMDB0003252	BioDeepDB	2	neg	1.59841e+06	1.4201e+06	2.34398e+06	2.06273e+06	3.3283e+06	6.85904e+06	1.80527e+06	2.22968e+06
M409T813	LysoPA(16_0_0_0)	409.234	813.5	410.243	4.45711	C19H39O7P	[M-H]-	Glycerophospholipids	Glycerophosphates	C04036			HMDB0007853	BioDeepDB	2	neg	4.94785e+07	5.80104e+07	1.24123e+07	2.90354e+07	1.71373e+07	1.35477e+07	8.77833e+06	1.34233e+07
M423T835	Alpha-Tocotrienol	423.324	835.3	424.334	6.19856	C29H44O2	[M-H]-	Prenol lipids	Quinone and hydroquinone lipids	C14153	Metabolism of cofactors and vitamins	1721-51-3/58864-81-6	HMDB0006327	BioDeepDB	2	neg	1.44133e+07	1.38614e+06	1.34945e+07	1.36541e+07	2.42552e+06	1.26623e+07	1.99485e+07	1.38808e+07
M455T388_2	FMN	455.091	387.9	456.105	14.7223	C17H21N4O9P	[M-H]-	Flavin nucleotides		C00061	Energy metabolism; Metabolism of cofactors and vitamins; Digestive system	146-17-8/6184-17-4	HMDB0001520	BioDeepDB	2	neg	1.73125e+06	5.08137e+07	2.44672e+06	2.68671e+06	5.16521e+07	3.96188e+07	4.19516e+07	6.97588e+07
M503T103_1	Raffinose	503.157	102.6	504.169	8.99123	C18H32O16	[M-H]-	Organooxygen compounds	Carbohydrates and carbohydrate conjugates	C00492	Carbohydrate metabolism; Membrane transport	512-69-6	HMDB0003213	BioDeepDB	2	neg	2.64976e+06	927703	2.44752e+06	2.44855e+06	2.40428e+06	1.5349e+06	3.00501e+06	2.21322e+06
M179T529	Fructose-1P	179.058	528.7	180.063	3.60639	C6H12O6	[M-H]-	Carbohydrates and carbohydrate conjugates	Monosaccharides	C10906		57-48-7	HMDB0062538	BioDeepDB	2	neg	2.2599e+06	4.90424e+06	2.27577e+06	496569	2.38061e+06	2.27161e+06	1.0563e+07	5.40561e+06
M179T135	alpha-D-Mannose	179.054	135.3	180.063	13.5378	C6H12O6	[M-H]-			C00936		3458-28-4/7296-15-3		BioDeepDB	2	neg	2.24979e+07	2.35309e+07	9.85376e+06	1.91425e+07	1.91572e+07	8.15401e+06	2.21968e+07	1.77247e+07
M198T189	Procollagen 5-hydroxy-L-lysine	197.808	189.3		2.2468	C7H13N3O3R2	[M-H]-			C01211	Amino acid metabolism	13204-98-3		BioDeepDB	2	neg	1.98959e+06	6.17929e+06	1.66655e+06	1.67937e+06	5.98301e+06	2.7418e+06	3.61816e+06	533137
M304T108	2',3'-Cyclic CMP	304.033	107.6	305.041	0.380465	C9H12N3O7P	[M-H]-			C02354	Nucleotide metabolism	633-90-9		BioDeepDB	2	neg	4.16878e+06	4.39015e+06	4.20055e+06	2.98599e+06	2.4583e+06	1.86124e+06	3.17224e+06	6.19498e+06
M119T232	Purine	119.036	232.2	120.044	1.00917	C5H4N4	[M-H]-	Imidazopyrimidines	Purines and purine derivatives	C15587		120-73-0	HMDB0001366	MoNA	2	neg	1.1972e+07	1.72485e+07	1.27062e+07	1.3413e+07	1.20195e+07	1.14685e+07	1.55118e+07	8.09372e+06
M179T717	Theobromine	179.053	716.8	180.065	24.1493	C7H8N4O2	[M-H]-	Imidazopyrimidines	Purines and purine derivatives	C07480	Biosynthesis of other secondary metabolites	83-67-0	HMDB0002825	MoNA	2	neg	3.28726e+06	2.2356e+06	3.13017e+06	3.03027e+06	2.80242e+06	2.92507e+06	3.15559e+06	3.48188e+06
M435T795_1	Paxilline	435.237	795.4	435.241	9.64992	C27H33NO4	[M]-	Naphthopyrans		C13782		57186-25-1	HMDB0030323	GNPS	2	neg	5.58877e+07	3.81341e+07	6.90234e+07	6.46389e+07	4.08173e+07	4.31203e+07	6.21528e+07	4.85643e+07
M116T248	5-Aminopentanoic acid	116.071	247.9	117.079	9.49932	C5H11NO2	[M-H]-	Carboxylic acids and derivatives	Amino acids, peptides, and analogues	C00431	Amino acid metabolism	660-88-8	HMDB0003355	MoNA	2	neg	6.56188e+06	6.83526e+06	2.04077e+07	3.06573e+07	2.10878e+07	5.97366e+06	2.47673e+07	1.63894e+07
M144T571	1H-Indole-3-carboxaldehyde	144.046	571.1	145.053	0.08439	C9H7NO	[M-H]-	Indoles and derivatives	Indoles	C08493		487-89-8	HMDB0029737	MoNA	2	neg	2.19752e+07	5.1129e+07	2.18625e+07	1.2995e+07	5.08659e+06	4.59532e+06	5.66785e+06	1.70403e+07
M147T74	Citramalic acid	147.029	74.4	148.037	5.42312	C5H8O5	[M-H]-	Fatty Acyls	Fatty acids and conjugates	C00815		597-44-4/2306-22-1	HMDB0000426	MoNA	2	neg	5.61056e+07	3.47313e+07	9.18219e+07	1.13942e+08	5.79505e+07	2.37341e+07	1.17105e+08	1.23278e+08
M179T148	D-Glucose	179.054	148.4	180.063	13.4714	C6H12O6	[M-H]-	Organooxygen compounds	Carbohydrates and carbohydrate conjugates	C00031	Endocrine and metabolic disease; Membrane transport; Sensory system; Signal transduction; Digestive system; Endocrine system; Cancer: overview; Carbohydrate metabolism; Biosynthesis of other secondary metabolites	50-99-7/50-99-7 2280-44-6/2280-44-6	HMDB0000122	MoNA	2	neg	3.2262e+06	1.29249e+07	8.65736e+06	7.71568e+06	8.86718e+06	2.61208e+06	1.85102e+07	8.28491e+06
M171T76	Beta-Glycerophosphoric acid	171.006	75.5	172.014	1.16158	C3H9O6P	[M-H]-	Glycerophospholipids	Glycerophosphates	C02979		17181-54-3	HMDB0002520	MoNA	2	neg	2.05044e+08	9.57086e+08	5.27319e+08	3.72103e+08	9.65703e+07	1.06988e+08	4.49379e+07	1.77321e+08
M184T392	Ecgonine	184.098	392.1	185.105	0.637379	C9H15NO3	[M-H]-	Tropane alkaloids		C10858		481-37-8	HMDB0006548	MoNA	2	neg	1.05953e+07	1.82676e+07	724444	1.34287e+06	716917	2.24462e+06	4.42016e+06	322733
M196T101_2	N-Acetylhistidine	196.072	101.3	197.08	1.65245	C8H11N3O3	[M-H]-	Carboxylic acids and derivatives	Amino acids, peptides, and analogues	C02997		2497-02-1	HMDB0032055	MoNA	2	neg	1.35545e+07	1.96103e+07	1.03597e+07	1.38162e+07	1.63443e+07	1.39233e+07	1.90325e+07	2.6224e+07
M220T526	Metaxalone	220.098	526.4	221.105	0.533127	C12H15NO3	[M-H]-	Phenol ethers		C07934		1665-48-1	HMDB0014798	MoNA	2	neg	404240	312197	781006	520285	692743	336597	471935	567961
M243T479	Biotin	243.081	478.7	244.088	1.5936	C10H16N2O3S	[M-H]-	Biotin and derivatives		C00120	Metabolism of cofactors and vitamins; Digestive system; Membrane transport	58-85-5	HMDB0000030	MoNA	2	neg	758404	1.89614e+06	498640	163452	580613	28027.3	29388.4	102731
M253T622	5,7-Dihydroxyflavone	253.05	622.2	254.058	4.04664	C15H10O4	[M-H]-	Flavonoids	Flavones	C10028		480-40-0	HMDB0036619	MoNA	2	neg	5.34168e+06	1.61692e+07	1.11327e+07	5.07954e+06	5.24207e+06	3.75767e+06	8.98112e+06	7.34916e+06
M255T621	Isoliquiritigenin	255.073	620.9	256.074	24.9968	C15H12O4	[M-H]-	Linear 1,3-diarylpropanoids	Chalcones and dihydrochalcones	C08650		961-29-5	HMDB0037316	MoNA	2	neg	1.89129e+08	1.14745e+08	1.93671e+08	1.92531e+08	6.29008e+07	7.06164e+07	1.98162e+08	1.115e+08
M279T739	Bovinic acid	279.232	738.6	280.24	2.95095	C18H32O2	[M-H]-	Fatty Acyls	Lineolic acids and derivatives	C04056	Lipid metabolism	2540-56-9	HMDB0003797	MoNA	2	neg	8.8281e+07	1.00844e+08	1.20404e+07	2.92133e+07	1.82426e+07	2.24738e+07	7.33263e+07	2.24976e+07
M352T628	Prostaglandin D2	352.22	628.2	352.225	14.4796	C20H32O5	[M]-	Fatty Acyls	Eicosanoids	C00696	Nervous system; Lipid metabolism; Signaling molecules and interaction; Immune disease; Immune system; Infectious disease: parasitic	41598-07-6	HMDB0001403	MoNA	2	neg	3.74492e+06	1.34015e+06	3.48242e+06	4.90923e+06	2.97072e+06	5.47448e+06	5.65524e+06	1.12533e+07
M359T71	Sinigrin	359.039	71.3	359.034	12.5335	C10H17NO9S2	[M]-	Organooxygen compounds	Carbohydrates and carbohydrate conjugates	C08427		534-69-0/3952-98-5	HMDB0034070	MoNA	2	neg	5.27054e+06	5.03612e+06	4.17698e+06	3.40064e+06	5.5278e+06	8.4646e+06	5.35948e+06	5.38286e+06
M111T68	2-Furoate	111.009	68.2	112.016	0.216199	C5H4O3	[M-H]-	Furans	Furoic acid and derivatives	C01546		88-14-2	HMDB0000617	mzCloud	2	neg	4.51799e+06	2.13022e+06	3.19691e+06	3.71933e+06	6.46703e+06	1.90868e+06	1.03824e+07	1.335e+07
M129T68	Mesaconate	129.018	68.1	130.027	9.48704	C5H6O4	[M-H]-	Endogenous Metabolites; Industrial Chemicals		C01732	Carbohydrate metabolism	498-24-8		mzCloud	2	neg	1.32708e+07	4.73799e+07	1.41208e+07	1.2673e+07	3.67499e+07	9.50825e+06	1.08577e+07	1.12412e+07
M166T97	Thioguanine	166.018	97.2	167.027	9.78209	C5H5N5S	[M-H]-	Imidazopyrimidines	Purines and purine derivatives	C07648	Xenobiotics biodegradation and metabolism	154-42-7	HMDB0014496	mzCloud	2	neg	4.68342e+07	2.85652e+07	3.91397e+07	4.48767e+07	3.50495e+07	2.67022e+07	4.26445e+07	3.31061e+07
M152T691	3-Hydroxyanthranilate	152.035	690.9	153.043	0.499884	C7H7NO3	[M-H]-	Benzene and substituted derivatives	Benzoic acids and derivatives	C00632	Amino acid metabolism	548-93-6	HMDB0001476	mzCloud	2	neg	5.49772e+06	1.34225e+07	6.38532e+06	7.83253e+06	5.4521e+06	1.29021e+06	4.08926e+06	1.30123e+06
M161T310	beta-D-Fructose	161.043	310.1	180.063	11.8602	C6H12O6	[M-H2O-H]-	Organooxygen compounds	Carbohydrates and carbohydrate conjugates	C02336	Carbohydrate metabolism	53188-23-1	HMDB0000660	mzCloud	2	neg	3.38649e+07	5.23208e+07	5.86284e+07	2.85047e+07	1.27701e+07	2.53932e+06	2.91793e+07	1.11783e+07
M183T460	2,4-Dinitrophenol	183.005	460.1	184.012	1.22401	C6H4N2O5	[M-H]-	Textile Chemicals/Auxiliary/Dyes; Pesticides/Herbicides; Industrial Chemicals; Endogenous Metabolites		C02496		51-28-5		mzCloud	2	neg	9.78041e+06	6.8138e+06	1.13385e+07	1.16844e+07	6.57651e+06	1.24794e+07	1.22326e+07	1.16953e+07
M195T96	3,7-Dimethyluric acid	195.05	96.3	196.06	9.35142	C7H8N4O3	[M-H]-	Imidazopyrimidines	Purines and purine derivatives	C16360	Biosynthesis of other secondary metabolites	13087-49-5	HMDB0001982	mzCloud	2	neg	1.09728e+07	5.5022e+07	6.858e+06	6.80026e+06	3.38506e+07	3.18677e+07	2.82685e+07	3.04092e+07
M259T74	beta-D-Fructose 6-phosphate	259.022	74	260.03	2.02299	C6H13O9P	[M-H]-	Organooxygen compounds	Carbohydrates and carbohydrate conjugates	C05345	Carbohydrate metabolism		HMDB0003971	mzCloud	2	neg	2.09695e+08	2.03363e+08	8.54331e+07	1.55859e+08	7.67519e+07	8.11058e+07	1.34695e+08	1.93888e+08
M285T755	Hexadecanedioate	285.207	755.2	286.214	1.48664	C16H30O4	[M-H]-	Fatty Acyls	Fatty acids and conjugates	C19615		505-54-4	HMDB0000672	mzCloud	2	neg	5.83749e+06	6.74056e+06	2.06611e+06	3.91655e+06	6.72894e+06	4.10233e+06	6.86677e+06	2.93833e+06
M295T809	12,13-DHOME	295.227	808.6	314.246	1.05004	C18H34O4	[M-H2O-H]-	Fatty Acyls	Fatty acids and conjugates	C14829	Lipid metabolism		HMDB0004705	mzCloud	2	neg	6.64366e+06	3.63767e+06	2.83702e+06	3.18288e+06	2.39286e+06	1.20113e+07	3.22876e+06	6.84936e+06
