# Supplementary material for: PM2.5 exposure aggravates kidney damage by facilitating the lipid metabolism disorder in diabetic mice
Source: PeerJ. 2023 Sep 1;11:e15856. doi: 10.7717/peerj.15856 (PMC10476618; doi:10.7717/peerj.15856)
Supplement: Supplemental Information 2 — p < 0.05, VIP< 1. [file peerj-11-15856-s002.xlsx]

## Sheet: Sheet1
50 significantly DEMs between DKD and DKD+P groups
name	categories	Fold Change	P.value	VIP
Citrulline	Amino acids, peptides, and analogues	0.15	0.000306044	1.99575
Glycylleucine	Amino acids, peptides, and analogues	0.1	0.000281265	1.90914
N-methyl-L-glutamic Acid	Amino acids, peptides, and analogues	0.29	0.00150501	1.81869
L-Arogenate	Amino acids, peptides, and analogues	0.06	0.017695	1.71301
N-Acetylleucine	Amino acids, peptides, and analogues	0.24	0.040699	1.69535
(5-L-Glutamyl)-L-glutamate	Amino acids, peptides, and analogues	3.69	0.0202333	1.61828
Guanidinoacetate	Amino acids, peptides, and analogues	2.69	0.0268469	1.53666
Creatine	Amino acids, peptides, and analogues	0.41	0.0444577	1.43726
Beta-Leucine	Amino acids, peptides, and analogues	0.35	0.0387901	1.38924
D-Maltose	Carbohydrates and carbohydrate conjugates	0.21	0.00709154	1.66433
beta-D-Fructose	Carbohydrates and carbohydrate conjugates	0.32	0.0392579	1.49397
Glucose 6-phosphate	Carbohydrates and carbohydrate conjugates	0.49	0.0335083	1.48674
Mannitol 1-phosphate	Carbohydrates and carbohydrate conjugates	2.04	0.0435934	1.47754
N-Acetylmannosamine	Carbohydrates and carbohydrate conjugates	0.1	0.0316079	1.4094
Ribose 1,5-bisphosphate	Carbohydrates and carbohydrate conjugates	1.51	0.0451678	1.3698
Palmitic acid	Lipids and lipid-like molecules	4.16	0.0286079	1.50684
3-Hydroxymethylglutaric acid	Lipids and lipid-like molecules	2.93	0.0308558	1.6932
Corticosterone	Lipids and lipid-like molecules	1.89	0.0273196	1.61543
Cortisone	Lipids and lipid-like molecules	2.04	0.0451968	1.61499
Beta-Glycerophosphoric acid	Lipids and lipid-like molecules	0.21	0.0116438	1.55875
9,10-DHOME	Lipids and lipid-like molecules	0.31	0.0446803	1.33717
Propionylcarnitine	Lipids and lipid-like molecules	0.21	0.000419414	1.91061
Butyryl-L-carnitine	Lipids and lipid-like molecules	2.2	0.035008	1.48458
Cytosine	Nucleosides, nucleotides, and analogues	0.22	2.26527e-06	1.98789
Guanosine	Nucleosides, nucleotides, and analogues	0.06	0.00141996	1.83851				、
N7-Methylguanosine	Nucleosides, nucleotides, and analogues	2.75	0.0212797	1.79164
Thymidine	Nucleosides, nucleotides, and analogues	0.24	0.025737	1.63468
Cytidine	Nucleosides, nucleotides, and analogues	1.46	0.0172078	1.58466
Adenosine	Nucleosides, nucleotides, and analogues	1.68	0.0244485	1.57021
Uridine	Nucleosides, nucleotides, and analogues	1.54	0.0236878	1.54432
5'-Methylthioadenosine	Nucleosides, nucleotides, and analogues	0.19	0.0207418	1.5415
Quinolinic acid	Organoheterocyclic compounds	1.6	0.000152613	1.90578
Dihydrouracil	Organoheterocyclic compounds	0.16	4.15849e-06	1.90449
Pterin	Organoheterocyclic compounds	42.93	0.00641365	1.89104
N-Acetylserotonin	Organoheterocyclic compounds	0.49	0.0451843	1.53116
7,8-Dihydropteroic acid	Organoheterocyclic compounds	2.31	0.0306828	1.52435
1H-Indole-3-carboxaldehyde	Organoheterocyclic compounds	0.3	0.0248197	1.47545
Taurine	Organosulfonic acids and derivatives	2.42	0.0392854	1.50005
Pantothenic acid	Vtiamins and derivatives	0.04	0.0014034	1.82163
Pyridoxine	Vtiamins and derivatives	0.18	0.00140126	1.77932
Trigonelline	Vtiamins and derivatives	0.67	0.0419279	1.681
Dehydroascorbate	Vtiamins and derivatives	0.8	0.0148836	1.56243
3-Hydroxyanthranilate	Benzenoids	0.37	0.0356386	1.49324
Gentisic acid	Benzenoids	0.12	0.00811909	1.66008
1-Hydroxymethylnaphthalene	Benzenoids	0.17	0.0360633	1.45408
3-Hydroxyphenylacetic acid	Benzenoids	0.36	0.0212193	1.54887
Acetylphosphate	Organic acids and derivatives	0.09	2.10294e-07	2.00552
2-Keto-6-acetamidocaproate	Organic acids and derivatives	2.46	0.000903334	1.83808
O-Phosphoethanolamine	Organic acids and derivatives	0.58	0.00471899	1.74493
Phosphorylcholine	Organic acids and derivatives	3.64	0.0173852	1.66748
